# Supplementary material
Source: Elsevier journal article supplement (https://www.sciencedirect.com/science/article/pii/S2530064421000985)
Supplement: mmc1 [file S2530064421000985:mmc1.xlsx]

## Sheet: SM_table_1
sp	Longitude	Latitude
adenomera_hylaedactyla	-56.0979	-15.6014
adenomera_hylaedactyla	-55.75	-15.4333
adenomera_hylaedactyla	-48.5275	-7.15972
adenomera_hylaedactyla	-46.1725	-17.7425
adenomera_hylaedactyla	-56.6944	-20.1319
adenomera_hylaedactyla	-43.4167	-13.25
adenomera_hylaedactyla	-48.2072	-7.19111
adenomera_hylaedactyla	-55.7872	-20.4711
adenomera_hylaedactyla	-54.6464	-20.4428
adenomera_hylaedactyla	-54.76	-18.5067
adenomera_hylaedactyla	-51.7144	-17.8814
adenomera_hylaedactyla	-50.0687	-9.96978
adenomera_hylaedactyla	-49.9096	-9.44628
adenomera_hylaedactyla	-50.0022	-9.39381
adenomera_hylaedactyla	-47.3142	-7.71
adenomera_hylaedactyla	-47.7569	-7.20472
adenomera_hylaedactyla	-45.8422	-6.60294
adenomera_hylaedactyla	-41.7767	-2.90472
adenomera_hylaedactyla	-41.872	-2.80251
ameerega_flavopicta	-47.8364	-14.1585
ameerega_flavopicta	-49.8166	-17.0295
ameerega_flavopicta	-47.8014	-13.6964
ameerega_flavopicta	-46.8247	-20.2097
ameerega_flavopicta	-46.8077	-20.3422
ameerega_flavopicta	-47.4504	-13.8454
ameerega_flavopicta	-43.529	-19.198
ameerega_flavopicta	-43.6297	-19.3367
ameerega_flavopicta	-47.277	-13.8598
ameerega_flavopicta	-47.4203	-13.9673
ameerega_flavopicta	-48.285	-15.824
ameerega_flavopicta	-48.3683	-15.7504
ameerega_flavopicta	-47.6465	-14.1894
ameerega_flavopicta	-47.739	-14.1581
ameerega_flavopicta	-46.6028	-20.2519
ameerega_flavopicta	-48.0783	-14.1514
ameerega_flavopicta	-48.255	-15.9397
ameerega_flavopicta	-46.1725	-17.7425
ameerega_flavopicta	-46.3881	-20.8636
ameerega_flavopicta	-46.2812	-20.6499
ameerega_flavopicta	-46.05	-20.6153
ameerega_flavopicta	-46.3658	-20.2453
ameerega_flavopicta	-43.745	-19.5136
ameerega_flavopicta	-45.6017	-19.4633
ameerega_flavopicta	-43.7142	-19.1692
ameerega_flavopicta	-44.8989	-18.7581
ameerega_flavopicta	-45.2417	-18.2064
ameerega_flavopicta	-44.2669	-18.1092
ameerega_flavopicta	-44.18	-17.8733
ameerega_flavopicta	-48.9592	-15.8525
ameerega_flavopicta	-47.9297	-15.7797
ameerega_flavopicta	-47.7951	-15.6548
ameerega_flavopicta	-47.3342	-15.5372
ameerega_flavopicta	-48.4597	-14.4739
ameerega_flavopicta	-47.51	-14.1325
ameerega_flavopicta	-48.22	-13.5331
ameerega_flavopicta	-47.8831	-12.6153
boana_albopunctata	-48.5665	-22.7752
boana_albopunctata	-47.7751	-14.1763
boana_albopunctata	-43.5868	-19.2778
boana_albopunctata	-47.746	-15.5901
boana_albopunctata	-47.7803	-21.0293
boana_albopunctata	-45.9082	-15.6914
boana_albopunctata	-44.3116	-17.8786
boana_albopunctata	-48.7118	-16.1984
boana_albopunctata	-47.8706	-15.7628
boana_albopunctata	-47.4672	-21.9592
boana_albopunctata	-47.6986	-22.3129
boana_albopunctata	-56.6315	-13.5407
boana_albopunctata	-45.8021	-14.644
boana_albopunctata	-47.8666	-15.9466
boana_albopunctata	-47.4712	-13.8039
boana_albopunctata	-48.6359	-23.0633
boana_albopunctata	-50.2399	-24.5788
boana_albopunctata	-55.78	-15.42
boana_albopunctata	-47.7	-21.6
boana_albopunctata	-48.445	-22.8858
boana_albopunctata	-47.8389	-18.2336
boana_albopunctata	-43.745	-19.5136
boana_albopunctata	-44.5778	-17.8889
boana_albopunctata	-43.7144	-19.1689
boana_albopunctata	-50.9281	-17.7981
boana_albopunctata	-43.65	-19
boana_albopunctata	-51.9264	-18.9653
boana_albopunctata	-48.0783	-14.1514
boana_albopunctata	-49.7058	-24.2511
boana_albopunctata	-48.3603	-10.2128
boana_albopunctata	-42.8897	-16.5594
boana_albopunctata	-53	-21
boana_albopunctata	-43.0108	-16.8722
boana_albopunctata	-43.7408	-18.4544
boana_albopunctata	-53.2153	-17.3147
boana_albopunctata	-46.1725	-17.7425
boana_albopunctata	-48.9592	-15.8525
boana_albopunctata	-49.0606	-22.3147
boana_albopunctata	-47.9319	-19.7483
boana_albopunctata	-46.5181	-18.5789
boana_albopunctata	-51.7342	-19.1133
boana_albopunctata	-48.3581	-9.75139
boana_albopunctata	-48.255	-15.9397
boana_albopunctata	-48.35	-23.4
boana_albopunctata	-48.12	-22.78
boana_albopunctata	-48.8981	-22.7769
boana_albopunctata	-46.9419	-22.3722
boana_albopunctata	-48.1197	-22.2803
boana_albopunctata	-48.56	-21.77
boana_albopunctata	-47.47	-21.71
boana_albopunctata	-54.2736	-21.5686
boana_albopunctata	-54.3839	-21.4658
boana_albopunctata	-46.3881	-20.8636
boana_albopunctata	-46.0719	-20.6047
boana_albopunctata	-54.7514	-20.5388
boana_albopunctata	-55.7872	-20.4711
boana_albopunctata	-53.7592	-20.4433
boana_albopunctata	-54.6464	-20.4428
boana_albopunctata	-46.3658	-20.2453
boana_albopunctata	-44.3139	-19.7628
boana_albopunctata	-43.8894	-19.6272
boana_albopunctata	-54.0439	-19.5314
boana_albopunctata	-52.9913	-19.0701
boana_albopunctata	-53.8553	-19.025
boana_albopunctata	-53.1292	-18.5439
boana_albopunctata	-53.4177	-18.1588
boana_albopunctata	-48.6081	-16.6589
boana_albopunctata	-55.5142	-15.8342
boana_albopunctata	-56.0967	-15.5961
boana_albopunctata	-57.2275	-15.3244
boana_albopunctata	-58.1322	-13.6353
boana_albopunctata	-48.22	-13.5331
boana_albopunctata	-55.7114	-12.5453
boana_albopunctata	-49.5289	-11.7967
boana_albopunctata	-50.6692	-11.6172
boana_albopunctata	-48.2945	-10.2974
boana_albopunctata	-48.1288	-10.2971
boana_crepitans	-49.7721	-17.0855
boana_crepitans	-45.0057	-19.2236
boana_crepitans	-44.511	-13.5108
boana_crepitans	-43.4576	-19.5097
boana_crepitans	-46.3536	-13.7205
boana_crepitans	-44.4179	-19.883
boana_crepitans	-43.9892	-19.5478
boana_crepitans	-47.9167	-15.7833
boana_crepitans	-42.73	-17.2856
boana_crepitans	-44.2467	-19.4658
boana_crepitans	-44.3	-15.3333
boana_crepitans	-44.9733	-12.3633
boana_crepitans	-43.7144	-19.1689
boana_crepitans	-42.8622	-16.8003
boana_crepitans	-42.8897	-16.5594
boana_crepitans	-43.89	-19.6269
boana_crepitans	-43.7442	-16.8123
boana_crepitans	-44.0769	-15.17
boana_crepitans	-46.7811	-12.8312
boana_faber	-48.5879	-22.7543
boana_faber	-43.5971	-19.6694
boana_faber	-46.6623	-18.6233
boana_faber	-46.3678	-20.7941
boana_faber	-43.9311	-19.7293
boana_faber	-47.5901	-20.4568
boana_faber	-43.8931	-19.1724
boana_faber	-45.9549	-20.6309
boana_faber	-47.9218	-15.8267
boana_faber	-44.3067	-16.226
boana_faber	-45.6652	-20.3565
boana_faber	-43.8202	-16.7707
boana_faber	-47.9394	-22.8505
boana_faber	-47.6232	-22.2229
boana_faber	-50.4085	-24.5433
boana_faber	-44.4112	-19.8756
boana_faber	-48.5154	-23.6066
boana_faber	-49.7036	-24.2541
boana_faber	-44.6205	-20.0595
boana_faber	-48.8248	-22.5883
boana_faber	-48.9631	-22.4514
boana_faber	-48.445	-22.8858
boana_faber	-43.8897	-19.6272
boana_faber	-47.7	-21.6
boana_faber	-48.0783	-14.1514
boana_faber	-52.3531	-14.6733
boana_faber	-43.7144	-19.1689
boana_faber	-47.4017	-22.5647
boana_faber	-48.35	-23.4
boana_faber	-48.12	-22.78
boana_faber	-48.9519	-22.7778
boana_faber	-50.4097	-22.66
boana_faber	-47.8197	-22.25
boana_faber	-46.0719	-20.6047
boana_lundii	-47.9493	-16.244
boana_lundii	-44.3825	-19.7096
boana_lundii	-47.7707	-15.5648
boana_lundii	-48.568	-22.7686
boana_lundii	-47.9444	-15.962
boana_lundii	-47.9492	-18.1629
boana_lundii	-47.7892	-15.8589
boana_lundii	-48.2582	-15.9417
boana_lundii	-48.3416	-22.8775
boana_lundii	-44.4206	-19.8731
boana_lundii	-44.7249	-20.076
boana_lundii	-48.9534	-16.3286
boana_lundii	-48.9895	-22.4691
boana_lundii	-47.9547	-15.5753
boana_lundii	-47.9297	-15.7797
boana_lundii	-48.22	-13.5331
boana_lundii	-42.8897	-16.5594
boana_lundii	-46.1725	-17.7425
boana_lundii	-48.0783	-14.1514
boana_lundii	-45.6614	-20.3706
boana_lundii	-43.7144	-19.1689
boana_lundii	-46.5181	-18.5789
boana_lundii	-48.1	-19.1833
boana_lundii	-47.8389	-18.2336
boana_lundii	-43.65	-19
boana_lundii	-48.1272	-22.7894
boana_lundii	-46.05	-20.6153
boana_lundii	-48.4397	-22.88
boana_lundii	-48.9519	-22.7778
boana_lundii	-48.1197	-22.2803
boana_lundii	-47.8197	-22.25
boana_lundii	-47.6597	-22.1203
boana_lundii	-47.47	-21.71
boana_lundii	-46.3881	-20.8636
boana_lundii	-51.5547	-19.8371
boana_lundii	-49.1956	-19.7247
boana_lundii	-43.7447	-19.5136
boana_lundii	-48.6218	-18.6624
boana_lundii	-53.3122	-17.9092
boana_lundii	-47.7783	-17.6331
boana_lundii	-53.2153	-17.3147
boana_lundii	-48.6081	-16.6589
boana_lundii	-47.51	-14.1325
boana_multifasciata	-48.3451	-10.467
boana_multifasciata	-48.22	-13.5331
boana_multifasciata	-49.1486	-13.4408
boana_multifasciata	-47.3142	-7.71
boana_multifasciata	-51.9264	-18.9653
boana_multifasciata	-48.2072	-7.19111
boana_multifasciata	-46.0356	-7.5325
boana_multifasciata	-43.6636	-8.09667
boana_multifasciata	-48.9592	-15.8525
boana_multifasciata	-48.5275	-7.15972
boana_multifasciata	-50.215	-16.1267
boana_multifasciata	-49.5289	-11.7967
boana_multifasciata	-50.5031	-10.4697
boana_multifasciata	-48.2945	-10.2974
boana_multifasciata	-49.9831	-9.40472
boana_multifasciata	-47.9258	-7.86
boana_multifasciata	-46.6172	-7.36194
boana_punctata	-48.3457	-10.4665
boana_punctata	-56.3041	-19.9542
boana_punctata	-43.4248	-3.24313
boana_punctata	-46.6596	-10.1697
boana_punctata	-47.9258	-7.86
boana_punctata	-45.1411	-7.08444
boana_punctata	-53.2153	-17.3147
boana_punctata	-47.3142	-7.71
boana_punctata	-46.0356	-7.5325
boana_punctata	-48.5275	-7.15972
boana_punctata	-48.2072	-7.19111
boana_punctata	-43.6636	-8.09667
boana_punctata	-54.3839	-21.4658
boana_punctata	-56.5169	-20.9814
boana_punctata	-54.7517	-20.5381
boana_punctata	-54.5903	-20.4959
boana_punctata	-55.7872	-20.4711
boana_punctata	-54.6799	-20.4423
boana_punctata	-54.5894	-20.3944
boana_punctata	-54.0439	-19.5314
boana_punctata	-52.9913	-19.0701
boana_punctata	-53.8553	-19.025
boana_punctata	-53.1929	-19.0244
boana_punctata	-53.4177	-18.1588
boana_punctata	-56.0967	-15.5961
boana_punctata	-58.1322	-13.6353
boana_punctata	-45.2422	-7.55833
boana_raniceps	-51	-14.3779
boana_raniceps	-49.7824	-17.0683
boana_raniceps	-55.6468	-20.4494
boana_raniceps	-48.3368	-14.1574
boana_raniceps	-48.9418	-15.8806
boana_raniceps	-47.866	-15.4813
boana_raniceps	-56.3713	-20.2373
boana_raniceps	-55.9817	-20.4655
boana_raniceps	-47.9467	-15.9158
boana_raniceps	-43.4248	-3.24313
boana_raniceps	-48.4314	-16.805
boana_raniceps	-41.9441	-2.80689
boana_raniceps	-55.8553	-15.3266
boana_raniceps	-56.4731	-21.1396
boana_raniceps	-48.0229	-15.7952
boana_raniceps	-56.1089	-15.4903
boana_raniceps	-44.2061	-18.36
boana_raniceps	-43.6314	-16.7978
boana_raniceps	-46.1725	-17.7425
boana_raniceps	-56.4892	-15.2356
boana_raniceps	-56.6944	-20.1319
boana_raniceps	-48.9158	-14.9708
boana_raniceps	-51.0936	-20.0867
boana_raniceps	-51.7342	-19.1133
boana_raniceps	-45.1931	-11.0483
boana_raniceps	-55.75	-15.4333
boana_raniceps	-47.7	-21.6
boana_raniceps	-48.5275	-7.15972
boana_raniceps	-48.0783	-14.1514
boana_raniceps	-47.3142	-7.71
boana_raniceps	-53.2153	-17.3147
boana_raniceps	-51.9264	-18.9653
boana_raniceps	-52.3531	-14.6733
boana_raniceps	-56.4167	-14.8333
boana_raniceps	-44.99	-12.1528
boana_raniceps	-49.1486	-13.4408
boana_raniceps	-55.5333	-20.4333
boana_raniceps	-48.1156	-8.39389
boana_raniceps	-47.9258	-7.86
boana_raniceps	-54.2736	-21.5686
boana_raniceps	-54.3839	-21.4658
boana_raniceps	-55.83	-21.1353
boana_raniceps	-56.515	-20.996
boana_raniceps	-54.9614	-20.9319
boana_raniceps	-51.7158	-20.7727
boana_raniceps	-54.8767	-20.7593
boana_raniceps	-54.7514	-20.5388
boana_raniceps	-56.715	-20.5386
boana_raniceps	-54.6153	-20.5038
boana_raniceps	-55.7872	-20.4711
boana_raniceps	-51.4189	-20.3672
boana_raniceps	-54.8294	-19.8317
boana_raniceps	-54.5608	-19.6367
boana_raniceps	-51.8955	-19.5596
boana_raniceps	-54.9864	-19.4654
boana_raniceps	-53.8569	-19.02
boana_raniceps	-49.3639	-18.5861
boana_raniceps	-53.1292	-18.5439
boana_raniceps	-53.4177	-18.1588
boana_raniceps	-48.5325	-17.9889
boana_raniceps	-46.5139	-17.835
boana_raniceps	-44.9419	-17.345
boana_raniceps	-50.215	-16.1267
boana_raniceps	-56.0967	-15.5961
boana_raniceps	-56.4236	-15.3261
boana_raniceps	-57.2275	-15.3244
boana_raniceps	-48.4597	-14.4739
boana_raniceps	-48.22	-13.5331
boana_raniceps	-46.7811	-12.8312
boana_raniceps	-49.5289	-11.7967
boana_raniceps	-49.0686	-11.7292
boana_raniceps	-50.6692	-11.6172
boana_raniceps	-49.6236	-10.7936
boana_raniceps	-48.4471	-8.16043
boana_raniceps	-46.6172	-7.36194
boana_raniceps	-44.1321	-6.78638
boana_raniceps	-43.8508	-4.38508
boana_raniceps	-43.9156	-3.54333
bokermannohyla_saxicola	-43.5203	-19.2594
bokermannohyla_saxicola	-43.7408	-18.4544
bokermannohyla_saxicola	-43.7144	-19.1689
bokermannohyla_saxicola	-43.745	-19.5136
bokermannohyla_saxicola	-43.6086	-19.3189
bokermannohyla_saxicola	-43.3764	-19.2156
bokermannohyla_saxicola	-43.6003	-18.2494
bokermannohyla_saxicola	-44.2669	-18.1092
bokermannohyla_saxicola	-43.2469	-18.0772
bokermannohyla_saxicola	-43.3908	-18.0042
bokermannohyla_saxicola	-44.18	-17.8733
bokermannohyla_saxicola	-44.1722	-17.7575
bokermannohyla_saxicola	-42.6925	-17.0833
bokermannohyla_saxicola	-43.3089	-17.0647
bokermannohyla_saxicola	-42.8897	-16.5594
bokermannohyla_saxicola	-43.4883	-16.4758
bokermannohyla_saxicola	-42.8714	-15.8286
chiasmocleis_albopunctata	-45.4311	-20.747
chiasmocleis_albopunctata	-47.9464	-15.7691
chiasmocleis_albopunctata	-49.8676	-15.5284
chiasmocleis_albopunctata	-51.4879	-16.5445
chiasmocleis_albopunctata	-45.8032	-14.6447
chiasmocleis_albopunctata	-56.0613	-15.6113
chiasmocleis_albopunctata	-48.9039	-22.8223
chiasmocleis_albopunctata	-48.5275	-7.15972
chiasmocleis_albopunctata	-49.1486	-13.4408
chiasmocleis_albopunctata	-46.9956	-11.5449
chiasmocleis_albopunctata	-47.7	-21.6
chiasmocleis_albopunctata	-48.1747	-8.9675
chiasmocleis_albopunctata	-46.1725	-17.7425
chiasmocleis_albopunctata	-55.75	-15.4333
chiasmocleis_albopunctata	-56.4275	-14.8361
chiasmocleis_albopunctata	-50.4486	-16.9478
chiasmocleis_albopunctata	-48.35	-23.4
chiasmocleis_albopunctata	-48.4628	-23.3446
chiasmocleis_albopunctata	-48.4894	-22.8919
chiasmocleis_albopunctata	-50.41	-22.66
chiasmocleis_albopunctata	-48.8659	-22.4317
chiasmocleis_albopunctata	-49.137	-22.4169
chiasmocleis_albopunctata	-49.0707	-22.3216
chiasmocleis_albopunctata	-48.1197	-22.2803
chiasmocleis_albopunctata	-47.8195	-22.2305
chiasmocleis_albopunctata	-47.61	-21.9
chiasmocleis_albopunctata	-48.5372	-21.6205
chiasmocleis_albopunctata	-47.7972	-21.6031
chiasmocleis_albopunctata	-48.6872	-21.4022
chiasmocleis_albopunctata	-56.5169	-20.9814
chiasmocleis_albopunctata	-48.5405	-20.885
chiasmocleis_albopunctata	-47.2871	-20.6415
chiasmocleis_albopunctata	-49.2439	-20.5506
chiasmocleis_albopunctata	-54.7517	-20.5381
chiasmocleis_albopunctata	-47.8567	-20.5133
chiasmocleis_albopunctata	-48.31	-20.31
chiasmocleis_albopunctata	-47.47	-20.25
chiasmocleis_albopunctata	-48.0196	-19.3139
chiasmocleis_albopunctata	-48.4418	-19.1811
chiasmocleis_albopunctata	-43.7144	-19.1689
chiasmocleis_albopunctata	-54.8442	-18.9181
chiasmocleis_albopunctata	-47.8863	-18.8031
chiasmocleis_albopunctata	-44.8989	-18.7581
chiasmocleis_albopunctata	-49.0994	-17.7311
chiasmocleis_albopunctata	-46.0094	-17.0097
chiasmocleis_albopunctata	-45.4139	-16.69
chiasmocleis_albopunctata	-42.8897	-16.5594
chiasmocleis_albopunctata	-51.8222	-16.4269
chiasmocleis_albopunctata	-45.0694	-16.3686
chiasmocleis_albopunctata	-47.0906	-16.0297
chiasmocleis_albopunctata	-55.8894	-15.48
chiasmocleis_albopunctata	-53.4575	-15.3494
chiasmocleis_albopunctata	-55.5396	-15.1071
chiasmocleis_albopunctata	-58.58	-15.1
chiasmocleis_albopunctata	-58.3104	-14.4346
chiasmocleis_albopunctata	-55.5959	-14.0751
chiasmocleis_albopunctata	-48.22	-13.5331
chiasmocleis_albopunctata	-47.8831	-12.6153
chiasmocleis_albopunctata	-46.8206	-11.6278
chiasmocleis_albopunctata	-47.4903	-7.33611
chiasmocleis_albopunctata	-47.4664	-6.5625
dendropsophus_cruzi	-49.7703	-17.0607
dendropsophus_cruzi	-48.3208	-10.6626
dendropsophus_cruzi	-49.5908	-16.1564
dendropsophus_cruzi	-49.9745	-9.41568
dendropsophus_cruzi	-48.5275	-7.15972
dendropsophus_cruzi	-48.2072	-7.19111
dendropsophus_cruzi	-47.3142	-7.71
dendropsophus_cruzi	-48.6081	-16.6589
dendropsophus_cruzi	-50.9281	-17.7981
dendropsophus_cruzi	-48.9592	-15.8525
dendropsophus_cruzi	-51.9264	-18.9653
dendropsophus_cruzi	-49.1511	-14.3114
dendropsophus_cruzi	-49.3796	-20.8108
dendropsophus_cruzi	-42.8897	-16.5594
dendropsophus_cruzi	-50.215	-16.1267
dendropsophus_cruzi	-51.3967	-16.0078
dendropsophus_cruzi	-48.8087	-15.9265
dendropsophus_cruzi	-55.7497	-15.4606
dendropsophus_cruzi	-48.0783	-14.1514
dendropsophus_cruzi	-48.2336	-11.975
dendropsophus_cruzi	-48.2945	-10.2974
dendropsophus_cruzi	-45.7428	-8.47528
dendropsophus_cruzi	-48.475	-8.05917
dendropsophus_cruzi	-47.9258	-7.86
dendropsophus_cruzi	-46.6172	-7.36194
dendropsophus_cruzi	-47.4694	-7.33278
dendropsophus_elianeae	-48.5675	-22.7681
dendropsophus_elianeae	-56.6944	-20.1319
dendropsophus_elianeae	-48.4628	-23.3446
dendropsophus_elianeae	-48.4397	-22.88
dendropsophus_elianeae	-49.2367	-22.8142
dendropsophus_elianeae	-47.15	-22.7603
dendropsophus_elianeae	-47.33	-22.73
dendropsophus_elianeae	-48.1261	-22.2841
dendropsophus_elianeae	-47.82	-22.25
dendropsophus_elianeae	-47.6256	-22.2206
dendropsophus_elianeae	-47.66	-22.12
dendropsophus_elianeae	-47.646	-21.72
dendropsophus_elianeae	-56.4819	-21.1211
dendropsophus_elianeae	-56.5162	-20.9824
dendropsophus_elianeae	-54.8767	-20.7593
dendropsophus_elianeae	-50.0942	-20.5036
dendropsophus_elianeae	-49.7799	-20.4819
dendropsophus_elianeae	-49.4343	-20.3915
dendropsophus_elianeae	-51.4189	-20.3672
dendropsophus_elianeae	-52.5767	-20.365
dendropsophus_elianeae	-49.1977	-20.3411
dendropsophus_elianeae	-47.47	-20.25
dendropsophus_elianeae	-55.0669	-20.1582
dendropsophus_elianeae	-54.8294	-19.8317
dendropsophus_elianeae	-54.9311	-19.7908
dendropsophus_elianeae	-54.5608	-19.6367
dendropsophus_elianeae	-54.0439	-19.5314
dendropsophus_elianeae	-48.0196	-19.3139
dendropsophus_elianeae	-53.8569	-19.02
dendropsophus_elianeae	-48.2769	-18.9186
dendropsophus_elianeae	-47.8863	-18.8031
dendropsophus_elianeae	-48.6218	-18.6624
dendropsophus_elianeae	-53.3122	-17.9092
dendropsophus_elianeae	-56.5281	-15.8315
dendropsophus_elianeae	-58.1267	-13.6328
dendropsophus_jimi	-51.9264	-18.9653
dendropsophus_jimi	-48.35	-23.4
dendropsophus_jimi	-48.4628	-23.3446
dendropsophus_jimi	-49.25	-22.9167
dendropsophus_jimi	-48.4397	-22.88
dendropsophus_jimi	-48.9819	-22.8369
dendropsophus_jimi	-49.2089	-22.8137
dendropsophus_jimi	-48.12	-22.28
dendropsophus_jimi	-47.82	-22.25
dendropsophus_jimi	-56.1381	-21.4803
dendropsophus_jimi	-54.7547	-20.5375
dendropsophus_jimi	-46.3658	-20.2453
dendropsophus_jimi	-48.0196	-19.3139
dendropsophus_jimi	-54.5886	-19.2825
dendropsophus_jimi	-53.8569	-19.02
dendropsophus_jimi	-48.2769	-18.9186
dendropsophus_jimi	-47.8863	-18.8031
dendropsophus_jimi	-48.6218	-18.6624
dendropsophus_jimi	-46.0094	-17.0097
dendropsophus_jimi	-48.6081	-16.6589
dendropsophus_melanargyreus	-49.7611	-17.1178
dendropsophus_melanargyreus	-56.8639	-15.1456
dendropsophus_melanargyreus	-56.4892	-15.2356
dendropsophus_melanargyreus	-44.2061	-18.36
dendropsophus_melanargyreus	-48.0783	-14.1514
dendropsophus_melanargyreus	-56.4275	-14.8361
dendropsophus_melanargyreus	-48.2772	-18.9186
dendropsophus_melanargyreus	-45.2417	-18.2064
dendropsophus_melanargyreus	-56.5281	-15.8315
dendropsophus_melanargyreus	-50.6131	-15.8233
dendropsophus_melanargyreus	-55.8894	-15.48
dendropsophus_melanargyreus	-55.7497	-15.4606
dendropsophus_melanargyreus	-55.5396	-15.1071
dendropsophus_melanargyreus	-58.58	-15.1
dendropsophus_melanargyreus	-58.3104	-14.4346
dendropsophus_melanargyreus	-58.1322	-13.6353
dendropsophus_melanargyreus	-48.22	-13.5331
dendropsophus_melanargyreus	-46.7811	-12.8312
dendropsophus_melanargyreus	-47.8831	-12.6153
dendropsophus_melanargyreus	-49.5289	-11.7967
dendropsophus_melanargyreus	-49.6236	-10.7936
dendropsophus_melanargyreus	-50.5031	-10.4697
dendropsophus_melanargyreus	-50.0003	-9.41842
dendropsophus_melanargyreus	-49.5564	-8.80361
dendropsophus_melanargyreus	-47.9258	-7.86
dendropsophus_melanargyreus	-44.1321	-6.78638
dendropsophus_melanargyreus	-47.7597	-6.71306
dendropsophus_melanargyreus	-43.3597	-3.7416
dendropsophus_melanargyreus	-43.9156	-3.54333
dendropsophus_microcephalus	-45.4139	-16.69
dendropsophus_microcephalus	-48.6081	-16.6589
dendropsophus_microcephalus	-55.5396	-15.1071
dendropsophus_microcephalus	-58.3104	-14.4346
dendropsophus_microcephalus	-56.1657	-13.0377
dendropsophus_microcephalus	-50.6694	-11.6172
dendropsophus_microcephalus	-46.0356	-7.5325
dendropsophus_microcephalus	-47.4694	-7.33278
dendropsophus_microcephalus	-41.7767	-2.90472
dendropsophus_microcephalus	-42.2744	-2.76194
dendropsophus_minutus	-45.5963	-20.4705
dendropsophus_minutus	-48.5907	-22.7402
dendropsophus_minutus	-49.7734	-17.0532
dendropsophus_minutus	-47.7772	-21.0278
dendropsophus_minutus	-47.8514	-15.6982
dendropsophus_minutus	-47.7731	-16.1124
dendropsophus_minutus	-48.345	-10.4666
dendropsophus_minutus	-44.2829	-17.883
dendropsophus_minutus	-45.5965	-19.4608
dendropsophus_minutus	-47.9787	-15.6865
dendropsophus_minutus	-49.5908	-16.1564
dendropsophus_minutus	-47.9696	-15.9159
dendropsophus_minutus	-47.8793	-15.9478
dendropsophus_minutus	-55.2167	-19.75
dendropsophus_minutus	-43.531	-19.2596
dendropsophus_minutus	-44.6205	-20.0595
dendropsophus_minutus	-49.2539	-16.6786
dendropsophus_minutus	-46.5181	-18.5789
dendropsophus_minutus	-45.2417	-18.2064
dendropsophus_minutus	-54.7531	-20.5381
dendropsophus_minutus	-43.6636	-8.09667
dendropsophus_minutus	-46.8539	-20.3439
dendropsophus_minutus	-43.65	-19
dendropsophus_minutus	-43.745	-19.5136
dendropsophus_minutus	-47.9319	-19.7483
dendropsophus_minutus	-48.255	-15.9397
dendropsophus_minutus	-46.1725	-17.7425
dendropsophus_minutus	-49.7058	-24.2511
dendropsophus_minutus	-48.0783	-14.1514
dendropsophus_minutus	-48.22	-13.5331
dendropsophus_minutus	-44.99	-12.1528
dendropsophus_minutus	-47.8389	-18.2336
dendropsophus_minutus	-55.7497	-15.4606
dendropsophus_minutus	-51.9264	-18.9653
dendropsophus_minutus	-42.73	-17.2856
dendropsophus_minutus	-53.2153	-17.3147
dendropsophus_minutus	-47.9167	-15.7833
dendropsophus_minutus	-49.0606	-22.3147
dendropsophus_minutus	-48.6158	-23.1017
dendropsophus_minutus	-48.5275	-7.15972
dendropsophus_minutus	-47.3142	-7.71
dendropsophus_minutus	-50.2399	-24.5788
dendropsophus_minutus	-48.35	-23.4
dendropsophus_minutus	-48.4628	-23.3446
dendropsophus_minutus	-48.44	-22.88
dendropsophus_minutus	-49.2089	-22.8137
dendropsophus_minutus	-48.1276	-22.7844
dendropsophus_minutus	-48.9519	-22.7778
dendropsophus_minutus	-47.15	-22.76
dendropsophus_minutus	-50.3967	-22.5966
dendropsophus_minutus	-48.8	-22.59
dendropsophus_minutus	-48.8659	-22.4317
dendropsophus_minutus	-47.7127	-22.3262
dendropsophus_minutus	-48.1197	-22.2803
dendropsophus_minutus	-48.4467	-22.2697
dendropsophus_minutus	-47.8277	-22.25
dendropsophus_minutus	-47.6256	-22.2206
dendropsophus_minutus	-47.6946	-22.1179
dendropsophus_minutus	-47.89	-22.01
dendropsophus_minutus	-47.646	-21.72
dendropsophus_minutus	-49.0741	-21.6204
dendropsophus_minutus	-47.7864	-21.5764
dendropsophus_minutus	-54.2172	-21.5064
dendropsophus_minutus	-56.1381	-21.4803
dendropsophus_minutus	-54.3839	-21.4658
dendropsophus_minutus	-55.83	-21.1353
dendropsophus_minutus	-56.4835	-21.1287
dendropsophus_minutus	-56.5162	-20.9824
dendropsophus_minutus	-46.3881	-20.8636
dendropsophus_minutus	-49.3796	-20.8108
dendropsophus_minutus	-54.8767	-20.7593
dendropsophus_minutus	-49.429	-20.6746
dendropsophus_minutus	-46.3294	-20.6672
dendropsophus_minutus	-47.2871	-20.6415
dendropsophus_minutus	-46.0719	-20.6047
dendropsophus_minutus	-47.8211	-20.5527
dendropsophus_minutus	-56.715	-20.5386
dendropsophus_minutus	-55.8069	-20.4836
dendropsophus_minutus	-55.6219	-20.4508
dendropsophus_minutus	-54.6464	-20.4428
dendropsophus_minutus	-49.4344	-20.3916
dendropsophus_minutus	-49.2751	-20.3745
dendropsophus_minutus	-45.6614	-20.3706
dendropsophus_minutus	-48.31	-20.31
dendropsophus_minutus	-49.1975	-20.303
dendropsophus_minutus	-47.47	-20.25
dendropsophus_minutus	-46.3658	-20.2453
dendropsophus_minutus	-47.4424	-19.8692
dendropsophus_minutus	-54.8294	-19.8317
dendropsophus_minutus	-54.9311	-19.7908
dendropsophus_minutus	-51.93	-19.7256
dendropsophus_minutus	-54.5608	-19.6367
dendropsophus_minutus	-43.8894	-19.6272
dendropsophus_minutus	-51.9081	-19.5659
dendropsophus_minutus	-54.0439	-19.5314
dendropsophus_minutus	-43.6187	-19.3277
dendropsophus_minutus	-48.0196	-19.3139
dendropsophus_minutus	-52.7825	-19.2482
dendropsophus_minutus	-43.7144	-19.1689
dendropsophus_minutus	-46.6897	-19.1114
dendropsophus_minutus	-48.276	-18.9106
dendropsophus_minutus	-47.8863	-18.8031
dendropsophus_minutus	-44.4308	-18.7564
dendropsophus_minutus	-53.1292	-18.5439
dendropsophus_minutus	-43.6003	-18.2494
dendropsophus_minutus	-44.2669	-18.1092
dendropsophus_minutus	-51.7734	-17.9385
dendropsophus_minutus	-53.3122	-17.9092
dendropsophus_minutus	-52.5511	-17.5694
dendropsophus_minutus	-54.606	-17.3359
dendropsophus_minutus	-49.0167	-17.3028
dendropsophus_minutus	-42.6925	-17.0833
dendropsophus_minutus	-50.1461	-17.0486
dendropsophus_minutus	-49.5319	-16.8306
dendropsophus_minutus	-42.8622	-16.8003
dendropsophus_minutus	-48.6081	-16.6589
dendropsophus_minutus	-42.8897	-16.5594
dendropsophus_minutus	-51.8222	-16.4269
dendropsophus_minutus	-45.0694	-16.3686
dendropsophus_minutus	-50.215	-16.1267
dendropsophus_minutus	-51.3967	-16.0078
dendropsophus_minutus	-50.1403	-15.9344
dendropsophus_minutus	-48.9592	-15.8525
dendropsophus_minutus	-56.5281	-15.8315
dendropsophus_minutus	-50.6131	-15.8233
dendropsophus_minutus	-55.5142	-15.8231
dendropsophus_minutus	-55.8894	-15.48
dendropsophus_minutus	-53.4153	-15.3414
dendropsophus_minutus	-54.1665	-15.3259
dendropsophus_minutus	-53.9518	-15.2411
dendropsophus_minutus	-54.0724	-15.2275
dendropsophus_minutus	-55.5396	-15.1071
dendropsophus_minutus	-58.58	-15.1
dendropsophus_minutus	-54.2193	-15.0984
dendropsophus_minutus	-58.3104	-14.4346
dendropsophus_minutus	-44.4328	-13.6194
dendropsophus_minutus	-56.1657	-13.0377
dendropsophus_minutus	-47.8831	-12.6153
dendropsophus_minutus	-55.7114	-12.5453
dendropsophus_minutus	-57.995	-12.4251
dendropsophus_minutus	-44.9733	-12.3633
dendropsophus_minutus	-59.323	-11.5308
dendropsophus_minutus	-48.4169	-10.7083
dendropsophus_minutus	-50.5031	-10.4697
dendropsophus_minutus	-48.2945	-10.2974
dendropsophus_minutus	-48.1375	-10.291
dendropsophus_minutus	-49.9629	-9.41441
dendropsophus_minutus	-49.9556	-9.27833
dendropsophus_minutus	-47.4694	-7.33278
dendropsophus_minutus	-45.8789	-6.63044
dendropsophus_minutus	-47.4511	-6.56056
dendropsophus_minutus	-42.7685	-5.041
dendropsophus_minutus	-43.9406	-4.25528
dendropsophus_minutus	-41.8669	-3.175
dendropsophus_nanus	-49.7721	-17.0794
dendropsophus_nanus	-45.5172	-15.4901
dendropsophus_nanus	-49.5908	-16.1564
dendropsophus_nanus	-55.2167	-19.75
dendropsophus_nanus	-54.6094	-20.3878
dendropsophus_nanus	-49.0627	-21.9808
dendropsophus_nanus	-47.7	-21.6
dendropsophus_nanus	-46.1725	-17.7425
dendropsophus_nanus	-56.4892	-15.2356
dendropsophus_nanus	-48.445	-22.8858
dendropsophus_nanus	-46.8217	-22.4361
dendropsophus_nanus	-48.1272	-22.7894
dendropsophus_nanus	-47.4667	-19.9333
dendropsophus_nanus	-54.9614	-20.9319
dendropsophus_nanus	-44.99	-12.1528
dendropsophus_nanus	-56.6944	-20.1319
dendropsophus_nanus	-48.8488	-16.6709
dendropsophus_nanus	-48.5706	-22.7311
dendropsophus_nanus	-56.0967	-15.5961
dendropsophus_nanus	-48.05	-23.6
dendropsophus_nanus	-55.5258	-20.4689
dendropsophus_nanus	-51.9264	-18.9653
dendropsophus_nanus	-55.2867	-20.4381
dendropsophus_nanus	-48.9592	-15.8525
dendropsophus_nanus	-48.9546	-16.5733
dendropsophus_nanus	-43.65	-19
dendropsophus_nanus	-44.5778	-17.8889
dendropsophus_nanus	-44.9733	-12.3633
dendropsophus_nanus	-50.215	-16.1267
dendropsophus_nanus	-49.7058	-24.2511
dendropsophus_nanus	-48.35	-23.4
dendropsophus_nanus	-48.72	-23.38
dendropsophus_nanus	-48.4628	-23.3446
dendropsophus_nanus	-49.2089	-22.8137
dendropsophus_nanus	-48.8981	-22.7769
dendropsophus_nanus	-50.4272	-22.6585
dendropsophus_nanus	-48.8	-22.59
dendropsophus_nanus	-48.8659	-22.4317
dendropsophus_nanus	-47.7127	-22.3262
dendropsophus_nanus	-48.1197	-22.2803
dendropsophus_nanus	-48.4467	-22.2697
dendropsophus_nanus	-47.826	-22.2496
dendropsophus_nanus	-49.0842	-22.2348
dendropsophus_nanus	-47.62	-22.22
dendropsophus_nanus	-47.6946	-22.1179
dendropsophus_nanus	-56.5211	-22.1089
dendropsophus_nanus	-47.89	-22.01
dendropsophus_nanus	-48.1697	-21.7903
dendropsophus_nanus	-48.5372	-21.6205
dendropsophus_nanus	-48.36	-21.6
dendropsophus_nanus	-56.1381	-21.4803
dendropsophus_nanus	-54.3839	-21.4658
dendropsophus_nanus	-47	-21.46
dendropsophus_nanus	-47.59	-21.21
dendropsophus_nanus	-55.83	-21.1353
dendropsophus_nanus	-56.4817	-21.1211
dendropsophus_nanus	-56.5211	-20.9685
dendropsophus_nanus	-49.3796	-20.8108
dendropsophus_nanus	-51.7158	-20.7727
dendropsophus_nanus	-54.8767	-20.7593
dendropsophus_nanus	-49.4359	-20.6866
dendropsophus_nanus	-47.2871	-20.6415
dendropsophus_nanus	-47.8211	-20.5527
dendropsophus_nanus	-56.715	-20.5386
dendropsophus_nanus	-54.7547	-20.5375
dendropsophus_nanus	-50.0866	-20.5144
dendropsophus_nanus	-54.6174	-20.5034
dendropsophus_nanus	-49.7799	-20.4819
dendropsophus_nanus	-55.7872	-20.4711
dendropsophus_nanus	-53.7607	-20.4572
dendropsophus_nanus	-47.8916	-20.4374
dendropsophus_nanus	-49.9722	-20.4252
dendropsophus_nanus	-49.4344	-20.3916
dendropsophus_nanus	-49.285	-20.3619
dendropsophus_nanus	-49.19	-20.34
dendropsophus_nanus	-47.47	-20.25
dendropsophus_nanus	-55.0669	-20.1582
dendropsophus_nanus	-54.9056	-19.8041
dendropsophus_nanus	-51.19	-19.677
dendropsophus_nanus	-54.6186	-19.4275
dendropsophus_nanus	-48.0196	-19.3139
dendropsophus_nanus	-53.8553	-19.025
dendropsophus_nanus	-54.472	-18.9378
dendropsophus_nanus	-48.2772	-18.9186
dendropsophus_nanus	-48.6218	-18.6624
dendropsophus_nanus	-53.1292	-18.5439
dendropsophus_nanus	-53.4177	-18.1588
dendropsophus_nanus	-51.7734	-17.9385
dendropsophus_nanus	-50.9305	-17.7965
dendropsophus_nanus	-52.5511	-17.5694
dendropsophus_nanus	-44.9419	-17.345
dendropsophus_nanus	-49.9258	-16.805
dendropsophus_nanus	-45.4139	-16.69
dendropsophus_nanus	-49.2539	-16.6786
dendropsophus_nanus	-48.6081	-16.6592
dendropsophus_nanus	-45.0694	-16.3686
dendropsophus_nanus	-51.3967	-16.0078
dendropsophus_nanus	-56.5281	-15.8315
dendropsophus_nanus	-54.9178	-15.8106
dendropsophus_nanus	-55.8894	-15.48
dendropsophus_nanus	-55.7497	-15.4606
dendropsophus_nanus	-56.3658	-15.2047
dendropsophus_nanus	-55.5396	-15.1071
dendropsophus_nanus	-58.58	-15.1
dendropsophus_nanus	-42.8192	-14.9261
dendropsophus_nanus	-42.9403	-14.5731
dendropsophus_nanus	-47.0503	-14.4486
dendropsophus_nanus	-58.3104	-14.4346
dendropsophus_nanus	-43.5967	-13.5625
dendropsophus_nanus	-43.4181	-13.255
dendropsophus_nanus	-47.8869	-12.8492
dendropsophus_nanus	-47.7128	-12.2672
dendropsophus_nanus	-49.5289	-11.7967
dendropsophus_nanus	-49.0686	-11.7292
dendropsophus_nanus	-50.6692	-11.6172
dendropsophus_nanus	-49.6236	-10.7936
dendropsophus_nanus	-50.5031	-10.4697
dendropsophus_nanus	-47.9258	-7.86
dendropsophus_nanus	-47.4694	-7.33278
dendropsophus_nanus	-47.7569	-7.20472
dendropsophus_nanus	-48.2072	-7.19111
dendropsophus_nanus	-44.1321	-6.78638
dendropsophus_nanus	-47.7597	-6.71306
dendropsophus_nanus	-47.4511	-6.56056
dendropsophus_nanus	-41.7767	-2.90472
dendropsophus_rubicundulus	-45.5963	-20.4705
dendropsophus_rubicundulus	-45.4311	-20.747
dendropsophus_rubicundulus	-47.7461	-15.5899
dendropsophus_rubicundulus	-49.77	-17.0626
dendropsophus_rubicundulus	-45.6652	-20.3566
dendropsophus_rubicundulus	-45.8021	-14.644
dendropsophus_rubicundulus	-44.6205	-20.0595
dendropsophus_rubicundulus	-48.4333	-22.8667
dendropsophus_rubicundulus	-51.9264	-18.9653
dendropsophus_rubicundulus	-46.1725	-17.7425
dendropsophus_rubicundulus	-48.9592	-15.8525
dendropsophus_rubicundulus	-56.0967	-15.5961
dendropsophus_rubicundulus	-43.65	-19
dendropsophus_rubicundulus	-49.1486	-13.4408
dendropsophus_rubicundulus	-46.5181	-18.5789
dendropsophus_rubicundulus	-44.2467	-19.4658
dendropsophus_rubicundulus	-44.99	-12.1528
dendropsophus_rubicundulus	-47.0486	-11.6086
dendropsophus_rubicundulus	-53.2153	-17.3147
dendropsophus_rubicundulus	-49.25	-22.9167
dendropsophus_rubicundulus	-47.15	-22.76
dendropsophus_rubicundulus	-48.17	-21.79
dendropsophus_rubicundulus	-55.7872	-20.4711
dendropsophus_rubicundulus	-53.7592	-20.4433
dendropsophus_rubicundulus	-45.5394	-20.2819
dendropsophus_rubicundulus	-46.3658	-20.2453
dendropsophus_rubicundulus	-44.3139	-19.7628
dendropsophus_rubicundulus	-43.8897	-19.6272
dendropsophus_rubicundulus	-43.745	-19.5136
dendropsophus_rubicundulus	-43.7144	-19.1689
dendropsophus_rubicundulus	-48.2769	-18.9186
dendropsophus_rubicundulus	-54.8442	-18.9181
dendropsophus_rubicundulus	-44.8989	-18.7581
dendropsophus_rubicundulus	-44.4308	-18.7564
dendropsophus_rubicundulus	-44.2231	-18.2969
dendropsophus_rubicundulus	-45.2314	-18.2059
dendropsophus_rubicundulus	-51.7734	-17.9385
dendropsophus_rubicundulus	-49.0167	-17.3028
dendropsophus_rubicundulus	-46.0094	-17.0097
dendropsophus_rubicundulus	-49.5319	-16.8306
dendropsophus_rubicundulus	-49.2539	-16.6786
dendropsophus_rubicundulus	-48.6081	-16.6589
dendropsophus_rubicundulus	-42.8897	-16.5594
dendropsophus_rubicundulus	-54.6356	-16.4708
dendropsophus_rubicundulus	-45.0694	-16.3686
dendropsophus_rubicundulus	-50.215	-16.1267
dendropsophus_rubicundulus	-50.1403	-15.9344
dendropsophus_rubicundulus	-50.6131	-15.8233
dendropsophus_rubicundulus	-55.8894	-15.48
dendropsophus_rubicundulus	-55.7497	-15.4606
dendropsophus_rubicundulus	-55.5396	-15.1071
dendropsophus_rubicundulus	-47.8831	-12.6153
dendropsophus_rubicundulus	-44.9733	-12.3633
dendropsophus_rubicundulus	-48.9708	-11.9933
dendropsophus_rubicundulus	-49.5289	-11.7967
dendropsophus_rubicundulus	-46.0356	-7.5325
dendropsophus_rubicundulus	-44.1321	-6.78638
dendropsophus_rubicundulus	-45.8415	-6.60768
dendropsophus_sanborni	-48.3222	-21.2547
dendropsophus_sanborni	-48.5706	-22.7311
dendropsophus_sanborni	-48.35	-23.4
dendropsophus_sanborni	-48.4397	-22.88
dendropsophus_sanborni	-48.9729	-22.8345
dendropsophus_sanborni	-48.1276	-22.7844
dendropsophus_sanborni	-46.9419	-22.3722
dendropsophus_sanborni	-47.7127	-22.3262
dendropsophus_sanborni	-47.8197	-22.25
dendropsophus_sanborni	-47.6256	-22.2206
dendropsophus_sanborni	-47.6946	-22.1179
dendropsophus_sanborni	-47.89	-22.01
dendropsophus_sanborni	-54.3839	-21.4658
dendropsophus_sanborni	-56.5169	-20.9814
dendropsophus_sanborni	-54.9614	-20.9319
dendropsophus_sanborni	-52.5767	-20.365
dendropsophus_sanborni	-49.285	-20.3619
dendropsophus_sanborni	-48.9592	-15.8525
dendropsophus_sanborni	-55.8894	-15.48
elachistocleis_bicolor	-56.6944	-20.1319
elachistocleis_bicolor	-56.0967	-15.5961
elachistocleis_bicolor	-48.72	-23.38
elachistocleis_bicolor	-48.4448	-22.8859
elachistocleis_bicolor	-49.2089	-22.8137
elachistocleis_bicolor	-48.8982	-22.7764
elachistocleis_bicolor	-50.41	-22.66
elachistocleis_bicolor	-47.8195	-22.2305
elachistocleis_bicolor	-54.3839	-21.4658
elachistocleis_bicolor	-49.3794	-20.8197
elachistocleis_bicolor	-55.7872	-20.4711
elachistocleis_bicolor	-51.4189	-20.3672
elachistocleis_bicolor	-49.1982	-20.3578
elachistocleis_bicolor	-49.4472	-17.525
elachistocleis_bicolor	-47.51	-14.1325
elachistocleis_bicolor	-58.0942	-13.6144
elachistocleis_cesarii	-45.4311	-20.747
elachistocleis_cesarii	-51.0297	-15.3815
elachistocleis_cesarii	-48.1328	-15.7722
elachistocleis_cesarii	-48.457	-15.8268
elachistocleis_cesarii	-47.8558	-15.6733
elachistocleis_cesarii	-49.1513	-16.546
elachistocleis_cesarii	-48.8901	-22.8299
elachistocleis_cesarii	-48.22	-13.5331
elachistocleis_cesarii	-48.9592	-15.8525
elachistocleis_cesarii	-48.445	-22.8858
elachistocleis_cesarii	-49.2539	-16.6786
elachistocleis_cesarii	-52.3531	-14.6733
elachistocleis_cesarii	-50.9281	-17.7981
elachistocleis_cesarii	-46.1725	-17.7425
elachistocleis_cesarii	-48.5706	-22.7311
elachistocleis_cesarii	-48.35	-23.4
elachistocleis_cesarii	-49.2089	-22.8137
elachistocleis_cesarii	-47.7127	-22.3262
elachistocleis_cesarii	-48.1197	-22.2803
elachistocleis_cesarii	-48.4467	-22.2697
elachistocleis_cesarii	-47.646	-21.72
elachistocleis_cesarii	-47.7972	-21.6031
elachistocleis_cesarii	-47.5674	-20.6362
elachistocleis_cesarii	-47.8211	-20.5527
elachistocleis_cesarii	-52.5767	-20.365
elachistocleis_cesarii	-45.6185	-20.3213
elachistocleis_cesarii	-54.6394	-19.6367
elachistocleis_cesarii	-43.745	-19.5136
elachistocleis_cesarii	-43.6187	-19.3277
elachistocleis_cesarii	-48.0196	-19.3139
elachistocleis_cesarii	-43.3764	-19.2156
elachistocleis_cesarii	-43.7142	-19.1692
elachistocleis_cesarii	-48.2772	-18.9186
elachistocleis_cesarii	-47.8863	-18.8031
elachistocleis_cesarii	-44.4308	-18.7564
elachistocleis_cesarii	-43.6003	-18.2494
elachistocleis_cesarii	-44.2669	-18.1092
elachistocleis_cesarii	-46.0094	-17.0097
elachistocleis_cesarii	-42.8897	-16.5594
elachistocleis_cesarii	-45.0694	-16.3686
elachistocleis_cesarii	-51.3967	-16.0078
elachistocleis_cesarii	-55.7497	-15.4606
elachistocleis_cesarii	-48.9158	-14.9708
elachistocleis_cesarii	-50.6692	-11.6172
leptodactylus_bolivianus	-49.0741	-21.6204
leptodactylus_bolivianus	-47.8103	-21.1775
leptodactylus_bolivianus	-52.0865	-20.9769
leptodactylus_bolivianus	-49.3796	-20.8108
leptodactylus_bolivianus	-49.4643	-20.6169
leptodactylus_bolivianus	-49.8942	-20.4519
leptodactylus_bolivianus	-49.4344	-20.3916
leptodactylus_bolivianus	-52.9291	-20.3701
leptodactylus_bolivianus	-49.2073	-20.3052
leptodactylus_bolivianus	-51.19	-19.677
leptodactylus_bolivianus	-43.8937	-19.6385
leptodactylus_bolivianus	-51.4078	-19.1832
leptodactylus_bolivianus	-45.2314	-18.2059
leptodactylus_bolivianus	-48.5396	-12.0371
leptodactylus_bolivianus	-42.7685	-5.041
leptodactylus_chaquensis	-55.9313	-13.0514
leptodactylus_chaquensis	-46.1725	-17.7425
leptodactylus_chaquensis	-50.937	-14.1826
leptodactylus_chaquensis	-56.4275	-14.8361
leptodactylus_chaquensis	-56.6944	-20.1319
leptodactylus_chaquensis	-56.3667	-20.2333
leptodactylus_chaquensis	-54.8504	-18.5958
leptodactylus_chaquensis	-44.9419	-17.345
leptodactylus_chaquensis	-49.1486	-13.4408
leptodactylus_chaquensis	-44.8611	-12.3181
leptodactylus_chaquensis	-49.1408	-14.5247
leptodactylus_chaquensis	-43.0225	-6.76694
leptodactylus_chaquensis	-55.7872	-20.4711
leptodactylus_chaquensis	-46.1131	-14.4878
leptodactylus_chaquensis	-43.8897	-19.6272
leptodactylus_chaquensis	-43.7772	-8.42444
leptodactylus_chaquensis	-52.3531	-14.6733
leptodactylus_chaquensis	-55.78	-15.42
leptodactylus_chaquensis	-47.8282	-22.2496
leptodactylus_chaquensis	-55.1683	-21.6144
leptodactylus_chaquensis	-57.6388	-21.5139
leptodactylus_chaquensis	-56.1381	-21.4803
leptodactylus_chaquensis	-54.3839	-21.4658
leptodactylus_chaquensis	-55.83	-21.1353
leptodactylus_chaquensis	-56.4819	-21.1211
leptodactylus_chaquensis	-56.5211	-20.9685
leptodactylus_chaquensis	-54.9614	-20.9319
leptodactylus_chaquensis	-48.4782	-20.9316
leptodactylus_chaquensis	-56.4401	-20.8135
leptodactylus_chaquensis	-51.7158	-20.7727
leptodactylus_chaquensis	-54.8767	-20.7593
leptodactylus_chaquensis	-49.2439	-20.5506
leptodactylus_chaquensis	-56.715	-20.5386
leptodactylus_chaquensis	-54.7547	-20.5375
leptodactylus_chaquensis	-50.0866	-20.5144
leptodactylus_chaquensis	-49.7778	-20.4778
leptodactylus_chaquensis	-55.4911	-20.4551
leptodactylus_chaquensis	-55.6219	-20.4508
leptodactylus_chaquensis	-54.6464	-20.4428
leptodactylus_chaquensis	-49.9722	-20.4252
leptodactylus_chaquensis	-49.4344	-20.3916
leptodactylus_chaquensis	-51.4189	-20.3672
leptodactylus_chaquensis	-49.285	-20.3619
leptodactylus_chaquensis	-54.8294	-19.8317
leptodactylus_chaquensis	-54.9311	-19.7908
leptodactylus_chaquensis	-54.0439	-19.5314
leptodactylus_chaquensis	-54.9869	-19.4494
leptodactylus_chaquensis	-51.5444	-19.0675
leptodactylus_chaquensis	-53.8553	-19.025
leptodactylus_chaquensis	-53.1292	-18.5439
leptodactylus_chaquensis	-54.76	-18.5067
leptodactylus_chaquensis	-53.7061	-18.3242
leptodactylus_chaquensis	-53.4158	-18.1651
leptodactylus_chaquensis	-44	-18
leptodactylus_chaquensis	-46.5144	-17.8353
leptodactylus_chaquensis	-42.75	-17.2833
leptodactylus_chaquensis	-46.0094	-17.0097
leptodactylus_chaquensis	-54.624	-16.4853
leptodactylus_chaquensis	-51.8222	-16.4269
leptodactylus_chaquensis	-56.5281	-15.8315
leptodactylus_chaquensis	-55.5142	-15.8231
leptodactylus_chaquensis	-55.8894	-15.48
leptodactylus_chaquensis	-54.1661	-15.3255
leptodactylus_chaquensis	-53.9467	-15.2484
leptodactylus_chaquensis	-54.0724	-15.2275
leptodactylus_chaquensis	-55.5396	-15.1071
leptodactylus_chaquensis	-58.58	-15.1
leptodactylus_chaquensis	-56.6375	-14.7487
leptodactylus_chaquensis	-55.8278	-14.6628
leptodactylus_chaquensis	-58.3104	-14.4346
leptodactylus_chaquensis	-56.7834	-13.5907
leptodactylus_chaquensis	-46.7811	-12.8312
leptodactylus_chaquensis	-57.995	-12.4251
leptodactylus_chaquensis	-43.6306	-10.7078
leptodactylus_chaquensis	-49.8859	-10.6626
leptodactylus_chaquensis	-49.9831	-9.40472
leptodactylus_chaquensis	-49.8174	-9.30047
leptodactylus_chaquensis	-44.4747	-9.14525
leptodactylus_chaquensis	-48.5103	-8.83417
leptodactylus_chaquensis	-46.6172	-7.36194
leptodactylus_chaquensis	-44.5583	-7.22278
leptodactylus_chaquensis	-46.3748	-7.21486
leptodactylus_chaquensis	-43.8508	-4.38508
leptodactylus_cunicularius	-43.65	-19
leptodactylus_cunicularius	-43.55	-19.23
leptodactylus_cunicularius	-43.745	-19.5136
leptodactylus_cunicularius	-46.7524	-20.2809
leptodactylus_cunicularius	-46.3658	-20.2453
leptodactylus_cunicularius	-43.6187	-19.3277
leptodactylus_cunicularius	-43.7142	-19.1692
leptodactylus_cunicularius	-45.9629	-19.0034
leptodactylus_cunicularius	-43.3908	-18.0042
leptodactylus_cunicularius	-42.8897	-16.5594
leptodactylus_cunicularius	-42.5397	-15.6097
leptodactylus_elenae	-56.6944	-20.1319
leptodactylus_elenae	-56.4892	-15.2356
leptodactylus_elenae	-56.4275	-14.8361
leptodactylus_elenae	-56.4835	-21.1287
leptodactylus_elenae	-56.5169	-20.9814
leptodactylus_elenae	-54.9614	-20.9319
leptodactylus_elenae	-54.8767	-20.7593
leptodactylus_elenae	-54.7517	-20.5381
leptodactylus_elenae	-55.7872	-20.4711
leptodactylus_elenae	-55.4984	-20.4551
leptodactylus_elenae	-54.6155	-20.4143
leptodactylus_elenae	-54.8294	-19.8317
leptodactylus_elenae	-56.5281	-15.8315
leptodactylus_elenae	-56.0967	-15.5961
leptodactylus_elenae	-55.8894	-15.48
leptodactylus_elenae	-53.4153	-15.3414
leptodactylus_elenae	-55.5396	-15.1071
leptodactylus_elenae	-58.3104	-14.4346
leptodactylus_elenae	-56.0772	-14.1604
leptodactylus_furnarius	-43.5111	-19.2571
leptodactylus_furnarius	-48.946	-15.8624
leptodactylus_furnarius	-47.9297	-15.7797
leptodactylus_furnarius	-46.1725	-17.7425
leptodactylus_furnarius	-43.0108	-16.8722
leptodactylus_furnarius	-43.65	-19
leptodactylus_furnarius	-50.4136	-24.5094
leptodactylus_furnarius	-49.7058	-24.2511
leptodactylus_furnarius	-48.4448	-22.8859
leptodactylus_furnarius	-48.1276	-22.7844
leptodactylus_furnarius	-50.41	-22.66
leptodactylus_furnarius	-48.1197	-22.2803
leptodactylus_furnarius	-48.4467	-22.2697
leptodactylus_furnarius	-48	-22.25
leptodactylus_furnarius	-47.82	-22.25
leptodactylus_furnarius	-48.51	-22.13
leptodactylus_furnarius	-47.6946	-22.1179
leptodactylus_furnarius	-46.3881	-20.8636
leptodactylus_furnarius	-46.0575	-20.6155
leptodactylus_furnarius	-54.7514	-20.5388
leptodactylus_furnarius	-50.2764	-20.4847
leptodactylus_furnarius	-54.6464	-20.4428
leptodactylus_furnarius	-45.6614	-20.3706
leptodactylus_furnarius	-49.1982	-20.3578
leptodactylus_furnarius	-46.3656	-20.2456
leptodactylus_furnarius	-43.745	-19.5136
leptodactylus_furnarius	-43.3764	-19.2156
leptodactylus_furnarius	-43.7144	-19.1689
leptodactylus_furnarius	-53.8553	-19.025
leptodactylus_furnarius	-47.8863	-18.8031
leptodactylus_furnarius	-53.7061	-18.3242
leptodactylus_furnarius	-43.6003	-18.2494
leptodactylus_furnarius	-44.2669	-18.1092
leptodactylus_furnarius	-44.18	-17.8733
leptodactylus_furnarius	-43.3089	-17.0647
leptodactylus_furnarius	-46.0094	-17.0097
leptodactylus_furnarius	-42.8897	-16.5594
leptodactylus_furnarius	-45.0694	-16.3686
leptodactylus_furnarius	-42.5397	-15.6097
leptodactylus_furnarius	-55.8894	-15.48
leptodactylus_furnarius	-55.7494	-15.4608
leptodactylus_furnarius	-55.5396	-15.1071
leptodactylus_furnarius	-48.9158	-14.9708
leptodactylus_furnarius	-46.4361	-12.4039
leptodactylus_fuscus	-43.764	-15.9898
leptodactylus_fuscus	-48.0337	-15.838
leptodactylus_fuscus	-45.5963	-20.4705
leptodactylus_fuscus	-45.5965	-19.4608
leptodactylus_fuscus	-49.7695	-17.0695
leptodactylus_fuscus	-47.4199	-20.4142
leptodactylus_fuscus	-46.8723	-17.2175
leptodactylus_fuscus	-48.2047	-15.7179
leptodactylus_fuscus	-44.5115	-13.5084
leptodactylus_fuscus	-47.7969	-21.0142
leptodactylus_fuscus	-46.6035	-12.9977
leptodactylus_fuscus	-45.6667	-20.3548
leptodactylus_fuscus	-45.8021	-14.644
leptodactylus_fuscus	-49.5908	-16.1564
leptodactylus_fuscus	-47.905	-15.7273
leptodactylus_fuscus	-56.1089	-15.4903
leptodactylus_fuscus	-48.0783	-14.1514
leptodactylus_fuscus	-47.7	-21.6
leptodactylus_fuscus	-44.9977	-12.1461
leptodactylus_fuscus	-56.4167	-14.8333
leptodactylus_fuscus	-56.6944	-20.1319
leptodactylus_fuscus	-44.4328	-13.6194
leptodactylus_fuscus	-46.1725	-17.7425
leptodactylus_fuscus	-49.2539	-16.6786
leptodactylus_fuscus	-48.1167	-22.8
leptodactylus_fuscus	-42.73	-17.2856
leptodactylus_fuscus	-51.7342	-19.1133
leptodactylus_fuscus	-53.2153	-17.3147
leptodactylus_fuscus	-44.8611	-12.3181
leptodactylus_fuscus	-49.1511	-14.3114
leptodactylus_fuscus	-45.2417	-18.2064
leptodactylus_fuscus	-55.78	-15.42
leptodactylus_fuscus	-44.9622	-17.3511
leptodactylus_fuscus	-48.9592	-15.8525
leptodactylus_fuscus	-46.7658	-12.9008
leptodactylus_fuscus	-56.4892	-15.2356
leptodactylus_fuscus	-47.9464	-18.1658
leptodactylus_fuscus	-50.937	-14.1826
leptodactylus_fuscus	-46.4667	-17.2833
leptodactylus_fuscus	-44.9757	-12.3644
leptodactylus_fuscus	-47.3142	-7.71
leptodactylus_fuscus	-48.2072	-7.19111
leptodactylus_fuscus	-44.5775	-17.8867
leptodactylus_fuscus	-50.2524	-24.5607
leptodactylus_fuscus	-48.35	-23.4
leptodactylus_fuscus	-48.4628	-23.3446
leptodactylus_fuscus	-48.445	-22.8858
leptodactylus_fuscus	-49.2089	-22.8137
leptodactylus_fuscus	-47.33	-22.73
leptodactylus_fuscus	-50.4272	-22.6585
leptodactylus_fuscus	-47.174	-22.5619
leptodactylus_fuscus	-48.8659	-22.4317
leptodactylus_fuscus	-49.137	-22.4169
leptodactylus_fuscus	-47.7127	-22.3262
leptodactylus_fuscus	-49.0707	-22.3216
leptodactylus_fuscus	-48.1197	-22.2803
leptodactylus_fuscus	-48.4467	-22.2697
leptodactylus_fuscus	-48	-22.25
leptodactylus_fuscus	-47.8195	-22.2305
leptodactylus_fuscus	-47.6256	-22.2206
leptodactylus_fuscus	-51.1706	-22.1458
leptodactylus_fuscus	-47.6946	-22.1179
leptodactylus_fuscus	-56.5278	-22.1138
leptodactylus_fuscus	-47.8716	-21.9715
leptodactylus_fuscus	-47.61	-21.9
leptodactylus_fuscus	-48.1	-21.72
leptodactylus_fuscus	-47.47	-21.71
leptodactylus_fuscus	-46.9667	-21.6667
leptodactylus_fuscus	-48.5372	-21.6205
leptodactylus_fuscus	-49.0741	-21.6204
leptodactylus_fuscus	-47.7972	-21.6031
leptodactylus_fuscus	-54.3839	-21.4658
leptodactylus_fuscus	-48.3222	-21.2547
leptodactylus_fuscus	-55.83	-21.1353
leptodactylus_fuscus	-56.4819	-21.1211
leptodactylus_fuscus	-56.5162	-20.9824
leptodactylus_fuscus	-54.9614	-20.9319
leptodactylus_fuscus	-48.4782	-20.9316
leptodactylus_fuscus	-49.3796	-20.8108
leptodactylus_fuscus	-54.8767	-20.7593
leptodactylus_fuscus	-49.476	-20.7481
leptodactylus_fuscus	-49.3837	-20.7101
leptodactylus_fuscus	-49.6492	-20.6264
leptodactylus_fuscus	-49.4643	-20.6169
leptodactylus_fuscus	-47.7943	-20.5691
leptodactylus_fuscus	-56.715	-20.5386
leptodactylus_fuscus	-54.7488	-20.5376
leptodactylus_fuscus	-49.7799	-20.4819
leptodactylus_fuscus	-55.7872	-20.4711
leptodactylus_fuscus	-53.7592	-20.4433
leptodactylus_fuscus	-54.6464	-20.4428
leptodactylus_fuscus	-47.8916	-20.4374
leptodactylus_fuscus	-49.4344	-20.3916
leptodactylus_fuscus	-49.285	-20.3619
leptodactylus_fuscus	-49.2073	-20.3052
leptodactylus_fuscus	-45.5394	-20.2819
leptodactylus_fuscus	-47.47	-20.25
leptodactylus_fuscus	-54.8294	-19.8317
leptodactylus_fuscus	-43.8937	-19.6385
leptodactylus_fuscus	-46.9406	-19.5933
leptodactylus_fuscus	-43.745	-19.5136
leptodactylus_fuscus	-54.9864	-19.4654
leptodactylus_fuscus	-54.5664	-19.3953
leptodactylus_fuscus	-48.0196	-19.3139
leptodactylus_fuscus	-43.3764	-19.2156
leptodactylus_fuscus	-43.7144	-19.1689
leptodactylus_fuscus	-48.2772	-18.9186
leptodactylus_fuscus	-47.8863	-18.8031
leptodactylus_fuscus	-44.4308	-18.7564
leptodactylus_fuscus	-53.1292	-18.5439
leptodactylus_fuscus	-53.7061	-18.3242
leptodactylus_fuscus	-53.3895	-18.1907
leptodactylus_fuscus	-51.7734	-17.9385
leptodactylus_fuscus	-53.3122	-17.9092
leptodactylus_fuscus	-50.9281	-17.7983
leptodactylus_fuscus	-54.436	-17.646
leptodactylus_fuscus	-42.6925	-17.0833
leptodactylus_fuscus	-46.0094	-17.0097
leptodactylus_fuscus	-42.8622	-16.8003
leptodactylus_fuscus	-42.8897	-16.5594
leptodactylus_fuscus	-54.624	-16.4853
leptodactylus_fuscus	-51.8222	-16.4269
leptodactylus_fuscus	-45.0694	-16.3686
leptodactylus_fuscus	-52.545	-16.1961
leptodactylus_fuscus	-51.3967	-16.0078
leptodactylus_fuscus	-56.5281	-15.8315
leptodactylus_fuscus	-46.4233	-15.6178
leptodactylus_fuscus	-56.0967	-15.5961
leptodactylus_fuscus	-55.8894	-15.48
leptodactylus_fuscus	-53.4153	-15.3414
leptodactylus_fuscus	-55.5396	-15.1071
leptodactylus_fuscus	-58.58	-15.1
leptodactylus_fuscus	-48.9158	-14.9708
leptodactylus_fuscus	-55.8278	-14.6628
leptodactylus_fuscus	-48.4597	-14.4739
leptodactylus_fuscus	-47.0503	-14.4486
leptodactylus_fuscus	-58.3104	-14.4346
leptodactylus_fuscus	-58.0942	-13.6144
leptodactylus_fuscus	-48.22	-13.5331
leptodactylus_fuscus	-43.4181	-13.255
leptodactylus_fuscus	-55.9402	-13.0556
leptodactylus_fuscus	-56.1657	-13.0377
leptodactylus_fuscus	-57.995	-12.4251
leptodactylus_fuscus	-48.5396	-12.0371
leptodactylus_fuscus	-49.5289	-11.7967
leptodactylus_fuscus	-49.0686	-11.7292
leptodactylus_fuscus	-49.6236	-10.7936
leptodactylus_fuscus	-48.4172	-10.7081
leptodactylus_fuscus	-43.6306	-10.7078
leptodactylus_fuscus	-48.1533	-10.3183
leptodactylus_fuscus	-48.3603	-10.2128
leptodactylus_fuscus	-46.6731	-9.59417
leptodactylus_fuscus	-49.9831	-9.40472
leptodactylus_fuscus	-48.5103	-8.83417
leptodactylus_fuscus	-49.5564	-8.80361
leptodactylus_fuscus	-46.6172	-7.36194
leptodactylus_fuscus	-47.4694	-7.33278
leptodactylus_fuscus	-44.5583	-7.22278
leptodactylus_fuscus	-45.8789	-6.63044
leptodactylus_fuscus	-47.4664	-6.5625
leptodactylus_fuscus	-47.3992	-6.33833
leptodactylus_fuscus	-42.7685	-5.041
leptodactylus_fuscus	-43.8508	-4.38508
leptodactylus_fuscus	-41.7767	-2.90472
leptodactylus_fuscus	-41.872	-2.80251
leptodactylus_fuscus	-43.2544	-2.50028
leptodactylus_labyrinthicus	-48.6322	-17.7356
leptodactylus_labyrinthicus	-48.0817	-15.7658
leptodactylus_labyrinthicus	-47.7454	-15.5915
leptodactylus_labyrinthicus	-49.7706	-17.0595
leptodactylus_labyrinthicus	-47.9494	-16.244
leptodactylus_labyrinthicus	-47.7732	-16.1123
leptodactylus_labyrinthicus	-47.445	-20.5356
leptodactylus_labyrinthicus	-47.8515	-15.6983
leptodactylus_labyrinthicus	-44.5113	-13.508
leptodactylus_labyrinthicus	-48.5901	-22.7234
leptodactylus_labyrinthicus	-48.2112	-21.6874
leptodactylus_labyrinthicus	-47.9333	-15.9702
leptodactylus_labyrinthicus	-47.7499	-19.7517
leptodactylus_labyrinthicus	-56.5732	-21.1029
leptodactylus_labyrinthicus	-45.4681	-17.6319
leptodactylus_labyrinthicus	-54.7119	-18.5035
leptodactylus_labyrinthicus	-47.8005	-15.876
leptodactylus_labyrinthicus	-47.261	-13.8736
leptodactylus_labyrinthicus	-51.4785	-16.5357
leptodactylus_labyrinthicus	-46.1725	-17.7425
leptodactylus_labyrinthicus	-43.7447	-19.5142
leptodactylus_labyrinthicus	-48.7167	-14.1667
leptodactylus_labyrinthicus	-48.445	-22.8858
leptodactylus_labyrinthicus	-49.1486	-13.4408
leptodactylus_labyrinthicus	-44.4328	-13.6194
leptodactylus_labyrinthicus	-48.9592	-15.8525
leptodactylus_labyrinthicus	-47.8	-21.1667
leptodactylus_labyrinthicus	-42.5903	-17.2186
leptodactylus_labyrinthicus	-43.0108	-16.8722
leptodactylus_labyrinthicus	-49.2667	-23.1833
leptodactylus_labyrinthicus	-43.7408	-18.4544
leptodactylus_labyrinthicus	-56.4275	-14.8361
leptodactylus_labyrinthicus	-51.9264	-18.9653
leptodactylus_labyrinthicus	-44.5778	-17.8889
leptodactylus_labyrinthicus	-52.3531	-14.6733
leptodactylus_labyrinthicus	-50.9281	-17.7981
leptodactylus_labyrinthicus	-50.2399	-24.5788
leptodactylus_labyrinthicus	-48.0783	-14.1514
leptodactylus_labyrinthicus	-46.4078	-12.7131
leptodactylus_labyrinthicus	-48.4628	-23.3446
leptodactylus_labyrinthicus	-49.2089	-22.8137
leptodactylus_labyrinthicus	-47.33	-22.73
leptodactylus_labyrinthicus	-50.4272	-22.6585
leptodactylus_labyrinthicus	-49.06	-22.31
leptodactylus_labyrinthicus	-48.1197	-22.2803
leptodactylus_labyrinthicus	-48.4467	-22.2697
leptodactylus_labyrinthicus	-48	-22.25
leptodactylus_labyrinthicus	-47.8195	-22.2305
leptodactylus_labyrinthicus	-47.61	-21.9
leptodactylus_labyrinthicus	-47.47	-21.71
leptodactylus_labyrinthicus	-47.6398	-21.6498
leptodactylus_labyrinthicus	-47.7972	-21.6031
leptodactylus_labyrinthicus	-47.6998	-21.5534
leptodactylus_labyrinthicus	-56.5211	-20.9685
leptodactylus_labyrinthicus	-46.3881	-20.8636
leptodactylus_labyrinthicus	-49.3794	-20.8197
leptodactylus_labyrinthicus	-49.3872	-20.6567
leptodactylus_labyrinthicus	-47.2871	-20.6415
leptodactylus_labyrinthicus	-47.8211	-20.5527
leptodactylus_labyrinthicus	-54.7543	-20.5377
leptodactylus_labyrinthicus	-55.8069	-20.4836
leptodactylus_labyrinthicus	-54.6007	-20.4674
leptodactylus_labyrinthicus	-54.8656	-20.4377
leptodactylus_labyrinthicus	-47.8916	-20.4374
leptodactylus_labyrinthicus	-49.9728	-20.4228
leptodactylus_labyrinthicus	-49.4343	-20.3915
leptodactylus_labyrinthicus	-49.2019	-20.3672
leptodactylus_labyrinthicus	-47.47	-20.25
leptodactylus_labyrinthicus	-46.463	-20.1601
leptodactylus_labyrinthicus	-46.8231	-19.9222
leptodactylus_labyrinthicus	-54.8294	-19.8317
leptodactylus_labyrinthicus	-54.9311	-19.7908
leptodactylus_labyrinthicus	-43.8937	-19.6385
leptodactylus_labyrinthicus	-51.9081	-19.5659
leptodactylus_labyrinthicus	-54.9864	-19.4654
leptodactylus_labyrinthicus	-43.3764	-19.2156
leptodactylus_labyrinthicus	-43.7142	-19.1692
leptodactylus_labyrinthicus	-47.6747	-19.1525
leptodactylus_labyrinthicus	-54.7772	-19.0875
leptodactylus_labyrinthicus	-44.8989	-18.7581
leptodactylus_labyrinthicus	-46.4181	-18.4178
leptodactylus_labyrinthicus	-53.7061	-18.3242
leptodactylus_labyrinthicus	-43.6003	-18.2494
leptodactylus_labyrinthicus	-45.2417	-18.2064
leptodactylus_labyrinthicus	-53.3895	-18.1907
leptodactylus_labyrinthicus	-47.9464	-18.1658
leptodactylus_labyrinthicus	-43.3908	-18.0042
leptodactylus_labyrinthicus	-44.1722	-17.7575
leptodactylus_labyrinthicus	-54.436	-17.646
leptodactylus_labyrinthicus	-54.606	-17.3359
leptodactylus_labyrinthicus	-43.3089	-17.0647
leptodactylus_labyrinthicus	-54.1481	-16.8733
leptodactylus_labyrinthicus	-42.8622	-16.8003
leptodactylus_labyrinthicus	-45.4139	-16.69
leptodactylus_labyrinthicus	-42.8897	-16.5594
leptodactylus_labyrinthicus	-51.8222	-16.4269
leptodactylus_labyrinthicus	-47.4047	-16.0106
leptodactylus_labyrinthicus	-51.3967	-16.0078
leptodactylus_labyrinthicus	-56.5281	-15.8315
leptodactylus_labyrinthicus	-55.5142	-15.8231
leptodactylus_labyrinthicus	-42.5397	-15.6097
leptodactylus_labyrinthicus	-56.0654	-15.6073
leptodactylus_labyrinthicus	-56.255	-15.5709
leptodactylus_labyrinthicus	-55.8894	-15.48
leptodactylus_labyrinthicus	-55.7497	-15.4606
leptodactylus_labyrinthicus	-53.4153	-15.3414
leptodactylus_labyrinthicus	-55.5396	-15.1071
leptodactylus_labyrinthicus	-58.58	-15.1
leptodactylus_labyrinthicus	-59.0268	-14.9798
leptodactylus_labyrinthicus	-48.9158	-14.9708
leptodactylus_labyrinthicus	-47.5247	-14.7056
leptodactylus_labyrinthicus	-58.3104	-14.4346
leptodactylus_labyrinthicus	-59.4545	-14.2076
leptodactylus_labyrinthicus	-59.4517	-13.971
leptodactylus_labyrinthicus	-48.22	-13.5331
leptodactylus_labyrinthicus	-55.9402	-13.0556
leptodactylus_labyrinthicus	-56.1657	-13.0377
leptodactylus_labyrinthicus	-46.7811	-12.8312
leptodactylus_labyrinthicus	-57.995	-12.4251
leptodactylus_labyrinthicus	-46.4361	-12.4039
leptodactylus_labyrinthicus	-49.5289	-11.7969
leptodactylus_labyrinthicus	-48.2945	-10.2974
leptodactylus_labyrinthicus	-49.9831	-9.40472
leptodactylus_labyrinthicus	-48.5103	-8.83417
leptodactylus_labyrinthicus	-48.2072	-7.19111
leptodactylus_labyrinthicus	-47.7597	-6.71306
leptodactylus_labyrinthicus	-47.4511	-6.56056
leptodactylus_latrans	-44.8692	-19.9852
leptodactylus_latrans	-45.4311	-20.747
leptodactylus_latrans	-44.3678	-6.37225
leptodactylus_latrans	-46.0422	-7.54132
leptodactylus_latrans	-49.7668	-17.0909
leptodactylus_latrans	-48.1377	-15.7746
leptodactylus_latrans	-44.5121	-13.5086
leptodactylus_latrans	-44.5481	-17.8566
leptodactylus_latrans	-46.7725	-19.0012
leptodactylus_latrans	-45.6667	-20.3549
leptodactylus_latrans	-48.2795	-10.7665
leptodactylus_latrans	-56.6315	-13.5407
leptodactylus_latrans	-48.0258	-15.8372
leptodactylus_latrans	-44.7324	-20.0697
leptodactylus_latrans	-51.5488	-19.0675
leptodactylus_latrans	-50.6631	-22.5127
leptodactylus_latrans	-52.3501	-14.6817
leptodactylus_latrans	-44.6205	-20.0595
leptodactylus_latrans	-48.1272	-22.7894
leptodactylus_latrans	-49.7058	-24.2511
leptodactylus_latrans	-44.2061	-18.36
leptodactylus_latrans	-45.3461	-7.14028
leptodactylus_latrans	-42.8897	-16.5594
leptodactylus_latrans	-48.1747	-8.9675
leptodactylus_latrans	-47.2003	-18.4733
leptodactylus_latrans	-51.7342	-19.1133
leptodactylus_latrans	-43.6003	-18.2494
leptodactylus_latrans	-48.445	-22.8867
leptodactylus_latrans	-48.6158	-23.1017
leptodactylus_latrans	-47.3142	-7.71
leptodactylus_latrans	-47.9258	-7.86
leptodactylus_latrans	-43.6314	-16.7978
leptodactylus_latrans	-45.2417	-18.2064
leptodactylus_latrans	-44.6489	-5.25806
leptodactylus_latrans	-48.5706	-22.7311
leptodactylus_latrans	-50.2524	-24.5607
leptodactylus_latrans	-48.35	-23.4
leptodactylus_latrans	-48.4628	-23.3446
leptodactylus_latrans	-48.1197	-22.2803
leptodactylus_latrans	-48.4467	-22.2697
leptodactylus_latrans	-47.82	-22.25
leptodactylus_latrans	-47.646	-21.72
leptodactylus_latrans	-47.7972	-21.6031
leptodactylus_latrans	-47.81	-21.17
leptodactylus_latrans	-47.7943	-20.5691
leptodactylus_latrans	-54.7514	-20.5388
leptodactylus_latrans	-47.8838	-20.4745
leptodactylus_latrans	-46.8231	-19.9222
leptodactylus_latrans	-49.2171	-19.9135
leptodactylus_latrans	-54.94	-19.8017
leptodactylus_latrans	-51.8955	-19.5596
leptodactylus_latrans	-43.745	-19.5136
leptodactylus_latrans	-44.2467	-19.4658
leptodactylus_latrans	-43.6187	-19.3277
leptodactylus_latrans	-48.0196	-19.3139
leptodactylus_latrans	-43.7144	-19.1689
leptodactylus_latrans	-47.6747	-19.1525
leptodactylus_latrans	-46.6897	-19.1114
leptodactylus_latrans	-47.8863	-18.8031
leptodactylus_latrans	-44.4308	-18.7564
leptodactylus_latrans	-44.4564	-18.3808
leptodactylus_latrans	-44.1722	-17.7575
leptodactylus_latrans	-43.3089	-17.0647
leptodactylus_latrans	-46.0094	-17.0097
leptodactylus_latrans	-45.4139	-16.69
leptodactylus_latrans	-45.0694	-16.3686
leptodactylus_latrans	-51.3967	-16.0078
leptodactylus_latrans	-42.9403	-14.5731
leptodactylus_latrans	-58.1267	-13.6328
leptodactylus_latrans	-49.1742	-12.1308
leptodactylus_latrans	-47.4694	-7.33278
leptodactylus_mystaceus	-45.5965	-19.4608
leptodactylus_mystaceus	-48.6381	-22.7349
leptodactylus_mystaceus	-49.7837	-17.0776
leptodactylus_mystaceus	-44.5111	-13.5072
leptodactylus_mystaceus	-48.2406	-21.9003
leptodactylus_mystaceus	-46.0106	-16.9934
leptodactylus_mystaceus	-47.8924	-15.7197
leptodactylus_mystaceus	-49.1513	-16.546
leptodactylus_mystaceus	-48.8121	-15.9249
leptodactylus_mystaceus	-47.9577	-15.9474
leptodactylus_mystaceus	-48.4597	-14.4739
leptodactylus_mystaceus	-46.9667	-11.6167
leptodactylus_mystaceus	-46.1725	-17.7425
leptodactylus_mystaceus	-48.445	-22.8858
leptodactylus_mystaceus	-48.9592	-15.8525
leptodactylus_mystaceus	-48.22	-13.5331
leptodactylus_mystaceus	-56.7246	-21.137
leptodactylus_mystaceus	-50.937	-14.1826
leptodactylus_mystaceus	-48.4628	-23.3446
leptodactylus_mystaceus	-48.12	-22.78
leptodactylus_mystaceus	-48.8981	-22.7769
leptodactylus_mystaceus	-50.41	-22.66
leptodactylus_mystaceus	-48.8659	-22.4317
leptodactylus_mystaceus	-49.137	-22.4169
leptodactylus_mystaceus	-46.9419	-22.3722
leptodactylus_mystaceus	-49.0707	-22.3216
leptodactylus_mystaceus	-48.4467	-22.2697
leptodactylus_mystaceus	-48.1344	-21.9713
leptodactylus_mystaceus	-47.47	-21.71
leptodactylus_mystaceus	-48.5372	-21.6205
leptodactylus_mystaceus	-47.6228	-21.6098
leptodactylus_mystaceus	-47.7972	-21.6031
leptodactylus_mystaceus	-47.2871	-20.6415
leptodactylus_mystaceus	-47.8211	-20.5527
leptodactylus_mystaceus	-49.2439	-20.5506
leptodactylus_mystaceus	-50.0867	-20.5144
leptodactylus_mystaceus	-50.2764	-20.4847
leptodactylus_mystaceus	-49.9722	-20.4252
leptodactylus_mystaceus	-45.6185	-20.3213
leptodactylus_mystaceus	-44.3139	-19.7628
leptodactylus_mystaceus	-44.9353	-19.2244
leptodactylus_mystaceus	-43.3764	-19.2156
leptodactylus_mystaceus	-48.4418	-19.1811
leptodactylus_mystaceus	-43.7144	-19.1689
leptodactylus_mystaceus	-44.8989	-18.7581
leptodactylus_mystaceus	-53.7061	-18.3242
leptodactylus_mystaceus	-53.3895	-18.1907
leptodactylus_mystaceus	-49.3547	-18.0125
leptodactylus_mystaceus	-44.5775	-17.8867
leptodactylus_mystaceus	-49.0994	-17.7311
leptodactylus_mystaceus	-45.0694	-16.3686
leptodactylus_mystaceus	-47.0906	-16.0297
leptodactylus_mystaceus	-47.3747	-15.9928
leptodactylus_mystaceus	-55.7497	-15.4606
leptodactylus_mystaceus	-55.5396	-15.1071
leptodactylus_mystaceus	-58.58	-15.1
leptodactylus_mystaceus	-48.0783	-14.1514
leptodactylus_mystaceus	-46.4078	-12.7131
leptodactylus_mystaceus	-57.995	-12.4251
leptodactylus_mystaceus	-44.9733	-12.3633
leptodactylus_mystaceus	-49.0686	-11.7292
leptodactylus_mystaceus	-46.8206	-11.6278
leptodactylus_mystaceus	-49.6236	-10.7936
leptodactylus_mystaceus	-50.0003	-9.41842
leptodactylus_mystaceus	-49.9556	-9.27833
leptodactylus_mystaceus	-49.5564	-8.80361
leptodactylus_mystaceus	-47.3142	-7.71
leptodactylus_mystaceus	-46.6172	-7.36194
leptodactylus_mystaceus	-47.4694	-7.33278
leptodactylus_mystaceus	-47.7569	-7.20472
leptodactylus_mystaceus	-44.1321	-6.78638
leptodactylus_mystaceus	-47.7597	-6.71306
leptodactylus_mystaceus	-45.8789	-6.63044
leptodactylus_mystaceus	-47.3992	-6.33833
leptodactylus_mystacinus	-43.764	-15.9898
leptodactylus_mystacinus	-48.1353	-15.7765
leptodactylus_mystacinus	-47.8689	-15.9473
leptodactylus_mystacinus	-49.7743	-17.0753
leptodactylus_mystacinus	-47.4193	-20.4253
leptodactylus_mystacinus	-52.5605	-17.5415
leptodactylus_mystacinus	-45.6798	-20.367
leptodactylus_mystacinus	-49.1513	-16.546
leptodactylus_mystacinus	-48.875	-22.8426
leptodactylus_mystacinus	-48.9592	-15.8525
leptodactylus_mystacinus	-48.0783	-14.1514
leptodactylus_mystacinus	-47.7	-21.6
leptodactylus_mystacinus	-46.1725	-17.7425
leptodactylus_mystacinus	-56.4275	-14.8361
leptodactylus_mystacinus	-46.9667	-11.6167
leptodactylus_mystacinus	-42.8897	-16.5594
leptodactylus_mystacinus	-47.9167	-15.7833
leptodactylus_mystacinus	-44.2467	-19.4658
leptodactylus_mystacinus	-43.6314	-16.7978
leptodactylus_mystacinus	-42.8622	-16.8003
leptodactylus_mystacinus	-48.35	-23.4
leptodactylus_mystacinus	-48.4628	-23.3446
leptodactylus_mystacinus	-48.4322	-22.8562
leptodactylus_mystacinus	-50.41	-22.66
leptodactylus_mystacinus	-48.8659	-22.4317
leptodactylus_mystacinus	-46.95	-22.43
leptodactylus_mystacinus	-49.137	-22.4169
leptodactylus_mystacinus	-49.06	-22.31
leptodactylus_mystacinus	-48.1197	-22.2803
leptodactylus_mystacinus	-48.4467	-22.2697
leptodactylus_mystacinus	-48	-22.25
leptodactylus_mystacinus	-47.82	-22.25
leptodactylus_mystacinus	-47.6258	-22.22
leptodactylus_mystacinus	-47.61	-21.9
leptodactylus_mystacinus	-48.5372	-21.6205
leptodactylus_mystacinus	-47.7972	-21.6031
leptodactylus_mystacinus	-56.1381	-21.4803
leptodactylus_mystacinus	-48.6872	-21.4022
leptodactylus_mystacinus	-48.3222	-21.2547
leptodactylus_mystacinus	-56.515	-20.996
leptodactylus_mystacinus	-54.9614	-20.9319
leptodactylus_mystacinus	-48.5406	-20.885
leptodactylus_mystacinus	-49.3794	-20.8197
leptodactylus_mystacinus	-47.2871	-20.6415
leptodactylus_mystacinus	-46.05	-20.6153
leptodactylus_mystacinus	-47.85	-20.58
leptodactylus_mystacinus	-56.715	-20.5386
leptodactylus_mystacinus	-49.2381	-20.5381
leptodactylus_mystacinus	-54.7517	-20.5381
leptodactylus_mystacinus	-50.0867	-20.5144
leptodactylus_mystacinus	-55.8069	-20.4836
leptodactylus_mystacinus	-54.6409	-20.4382
leptodactylus_mystacinus	-49.9722	-20.4252
leptodactylus_mystacinus	-49.4344	-20.3916
leptodactylus_mystacinus	-49.285	-20.3619
leptodactylus_mystacinus	-48.3106	-20.3183
leptodactylus_mystacinus	-45.5394	-20.2819
leptodactylus_mystacinus	-44.3139	-19.7628
leptodactylus_mystacinus	-46.9406	-19.5933
leptodactylus_mystacinus	-43.745	-19.5136
leptodactylus_mystacinus	-43.6187	-19.3277
leptodactylus_mystacinus	-48.0196	-19.3139
leptodactylus_mystacinus	-43.7144	-19.1689
leptodactylus_mystacinus	-47.8863	-18.8031
leptodactylus_mystacinus	-44.8989	-18.7581
leptodactylus_mystacinus	-53.1292	-18.5439
leptodactylus_mystacinus	-49.475	-18.4917
leptodactylus_mystacinus	-53.7061	-18.3242
leptodactylus_mystacinus	-44.2231	-18.2969
leptodactylus_mystacinus	-53.3895	-18.1907
leptodactylus_mystacinus	-53.3122	-17.9092
leptodactylus_mystacinus	-42.6925	-17.0833
leptodactylus_mystacinus	-46.0094	-17.0097
leptodactylus_mystacinus	-45.4139	-16.69
leptodactylus_mystacinus	-47.3228	-16.0325
leptodactylus_mystacinus	-51.3967	-16.0078
leptodactylus_mystacinus	-56.0967	-15.5961
leptodactylus_mystacinus	-55.8894	-15.48
leptodactylus_mystacinus	-55.5396	-15.1071
leptodactylus_mystacinus	-58.58	-15.1
leptodactylus_mystacinus	-55.8278	-14.6628
leptodactylus_mystacinus	-48.22	-13.5331
leptodactylus_mystacinus	-46.7811	-12.8312
leptodactylus_petersii	-51.2875	-11.0046
leptodactylus_petersii	-48.5275	-7.15972
leptodactylus_petersii	-56.0944	-15.6294
leptodactylus_petersii	-56.3658	-15.2047
leptodactylus_petersii	-55.5396	-15.1071
leptodactylus_petersii	-58.58	-15.1
leptodactylus_petersii	-54.2193	-15.0984
leptodactylus_petersii	-58.7514	-15.0494
leptodactylus_petersii	-56.1657	-13.0377
leptodactylus_petersii	-46.4078	-12.7131
leptodactylus_petersii	-44.5347	-12.3064
leptodactylus_petersii	-49.1822	-10.4425
leptodactylus_petersii	-50.0985	-9.46931
leptodactylus_petersii	-45.8789	-6.63044
leptodactylus_podicipinus	-49.7667	-17.067
leptodactylus_podicipinus	-47.8665	-15.9466
leptodactylus_podicipinus	-48.8092	-15.932
leptodactylus_podicipinus	-56.6944	-20.1319
leptodactylus_podicipinus	-56.4275	-14.8361
leptodactylus_podicipinus	-48.445	-22.8858
leptodactylus_podicipinus	-44.9333	-17.35
leptodactylus_podicipinus	-44.9977	-12.1461
leptodactylus_podicipinus	-50.937	-14.1826
leptodactylus_podicipinus	-52.8781	-20.4481
leptodactylus_podicipinus	-51.9264	-18.9653
leptodactylus_podicipinus	-52.3531	-14.6733
leptodactylus_podicipinus	-49.1408	-14.5247
leptodactylus_podicipinus	-55.78	-15.42
leptodactylus_podicipinus	-48.1167	-22.8
leptodactylus_podicipinus	-44.7266	-11.8283
leptodactylus_podicipinus	-55.15	-21.6333
leptodactylus_podicipinus	-48.5275	-7.15972
leptodactylus_podicipinus	-46.1725	-17.7425
leptodactylus_podicipinus	-47.7	-21.6
leptodactylus_podicipinus	-46.0356	-7.5325
leptodactylus_podicipinus	-51.0936	-20.0867
leptodactylus_podicipinus	-50.215	-16.1267
leptodactylus_podicipinus	-48.35	-23.4
leptodactylus_podicipinus	-48.5706	-22.7311
leptodactylus_podicipinus	-50.41	-22.66
leptodactylus_podicipinus	-48.8659	-22.4317
leptodactylus_podicipinus	-49.06	-22.31
leptodactylus_podicipinus	-51.1706	-22.1458
leptodactylus_podicipinus	-48.1697	-21.7903
leptodactylus_podicipinus	-47.646	-21.72
leptodactylus_podicipinus	-47.47	-21.71
leptodactylus_podicipinus	-46.9667	-21.6667
leptodactylus_podicipinus	-47.7972	-21.6031
leptodactylus_podicipinus	-57.6388	-21.5139
leptodactylus_podicipinus	-56.4403	-21.4569
leptodactylus_podicipinus	-48.32	-21.25
leptodactylus_podicipinus	-55.83	-21.1353
leptodactylus_podicipinus	-47.99	-21.13
leptodactylus_podicipinus	-56.476	-21.1275
leptodactylus_podicipinus	-56.5169	-20.9814
leptodactylus_podicipinus	-52.0865	-20.9769
leptodactylus_podicipinus	-54.9614	-20.9319
leptodactylus_podicipinus	-49.37	-20.82
leptodactylus_podicipinus	-51.7158	-20.7727
leptodactylus_podicipinus	-47.2871	-20.6415
leptodactylus_podicipinus	-49.4643	-20.6169
leptodactylus_podicipinus	-47.7943	-20.5691
leptodactylus_podicipinus	-56.715	-20.5386
leptodactylus_podicipinus	-54.7517	-20.5381
leptodactylus_podicipinus	-49.3142	-20.5339
leptodactylus_podicipinus	-54.6413	-20.5065
leptodactylus_podicipinus	-50.0942	-20.5036
leptodactylus_podicipinus	-47.8596	-20.4925
leptodactylus_podicipinus	-49.7778	-20.4778
leptodactylus_podicipinus	-55.7872	-20.4711
leptodactylus_podicipinus	-55.4984	-20.4551
leptodactylus_podicipinus	-49.8942	-20.4519
leptodactylus_podicipinus	-53.7592	-20.4433
leptodactylus_podicipinus	-54.5894	-20.3944
leptodactylus_podicipinus	-49.4331	-20.39
leptodactylus_podicipinus	-49.2517	-20.3817
leptodactylus_podicipinus	-51.4189	-20.3672
leptodactylus_podicipinus	-49.5047	-20.3211
leptodactylus_podicipinus	-49.1975	-20.303
leptodactylus_podicipinus	-55.0669	-20.1582
leptodactylus_podicipinus	-48.9506	-19.9621
leptodactylus_podicipinus	-54.8294	-19.8317
leptodactylus_podicipinus	-54.9311	-19.7908
leptodactylus_podicipinus	-51.19	-19.677
leptodactylus_podicipinus	-54.5608	-19.6367
leptodactylus_podicipinus	-51.8807	-19.5687
leptodactylus_podicipinus	-54.0439	-19.5314
leptodactylus_podicipinus	-50.3358	-19.5303
leptodactylus_podicipinus	-54.9864	-19.4654
leptodactylus_podicipinus	-51.0695	-19.295
leptodactylus_podicipinus	-52.7825	-19.2482
leptodactylus_podicipinus	-49.7864	-19.2133
leptodactylus_podicipinus	-51.4078	-19.1832
leptodactylus_podicipinus	-53.8553	-19.025
leptodactylus_podicipinus	-49.3639	-18.5861
leptodactylus_podicipinus	-53.1292	-18.5439
leptodactylus_podicipinus	-53.7061	-18.3242
leptodactylus_podicipinus	-53.4177	-18.1588
leptodactylus_podicipinus	-49.3547	-18.0125
leptodactylus_podicipinus	-50.9281	-17.7983
leptodactylus_podicipinus	-49.0994	-17.7311
leptodactylus_podicipinus	-49.4472	-17.525
leptodactylus_podicipinus	-45.4139	-16.69
leptodactylus_podicipinus	-49.2539	-16.6786
leptodactylus_podicipinus	-54.668	-16.5198
leptodactylus_podicipinus	-45.0694	-16.3686
leptodactylus_podicipinus	-51.3967	-16.0078
leptodactylus_podicipinus	-56.5281	-15.8315
leptodactylus_podicipinus	-56.0967	-15.5961
leptodactylus_podicipinus	-55.8894	-15.48
leptodactylus_podicipinus	-56.4214	-15.335
leptodactylus_podicipinus	-55.5396	-15.1071
leptodactylus_podicipinus	-48.4597	-14.4739
leptodactylus_podicipinus	-47.0503	-14.4486
leptodactylus_podicipinus	-58.3104	-14.4346
leptodactylus_podicipinus	-48.0783	-14.1514
leptodactylus_podicipinus	-49.1486	-13.4408
leptodactylus_podicipinus	-50.1628	-13.275
leptodactylus_podicipinus	-55.7114	-12.5453
leptodactylus_podicipinus	-57.995	-12.4251
leptodactylus_podicipinus	-49.1742	-12.1308
leptodactylus_podicipinus	-48.5396	-12.0371
leptodactylus_podicipinus	-48.9708	-11.9933
leptodactylus_podicipinus	-49.5289	-11.7967
leptodactylus_podicipinus	-49.0686	-11.7292
leptodactylus_podicipinus	-50.6694	-11.6172
leptodactylus_podicipinus	-48.4172	-10.7081
leptodactylus_podicipinus	-51.13	-10.2128
leptodactylus_podicipinus	-48.3762	-9.5654
leptodactylus_podicipinus	-49.9096	-9.44628
leptodactylus_podicipinus	-50.0003	-9.41842
leptodactylus_podicipinus	-49.8095	-9.28492
leptodactylus_podicipinus	-48.5103	-8.83417
leptodactylus_podicipinus	-49.5564	-8.80361
leptodactylus_podicipinus	-47.3142	-7.71
leptodactylus_podicipinus	-47.4694	-7.33278
leptodactylus_podicipinus	-48.2072	-7.19111
leptodactylus_podicipinus	-47.4511	-6.56056
leptodactylus_podicipinus	-47.3992	-6.33833
leptodactylus_pustulatus	-51.0313	-15.3477
leptodactylus_pustulatus	-48.5275	-7.15972
leptodactylus_pustulatus	-55.1683	-21.6144
leptodactylus_pustulatus	-50.937	-14.1826
leptodactylus_pustulatus	-47.9258	-7.86
leptodactylus_pustulatus	-51.3967	-16.0078
leptodactylus_pustulatus	-51.1606	-15.2411
leptodactylus_pustulatus	-52.35	-14.6667
leptodactylus_pustulatus	-53.2302	-13.9879
leptodactylus_pustulatus	-50.1628	-13.275
leptodactylus_pustulatus	-49.1742	-12.1308
leptodactylus_pustulatus	-48.5396	-12.0371
leptodactylus_pustulatus	-49.5289	-11.7967
leptodactylus_pustulatus	-49.0686	-11.7292
leptodactylus_pustulatus	-48.4172	-10.7081
leptodactylus_pustulatus	-49.9476	-9.35056
leptodactylus_pustulatus	-48.5103	-8.83417
leptodactylus_pustulatus	-48.475	-8.05917
leptodactylus_pustulatus	-47.7569	-7.20472
leptodactylus_pustulatus	-47.4664	-6.5625
leptodactylus_pustulatus	-42.8112	-5.0904
leptodactylus_pustulatus	-41.7767	-2.90472
leptodactylus_pustulatus	-43.2544	-2.50028
leptodactylus_syphax	-47.7472	-15.5925
leptodactylus_syphax	-48.7479	-17.7752
leptodactylus_syphax	-43.7144	-19.1689
leptodactylus_syphax	-48.0783	-14.1514
leptodactylus_syphax	-43.6314	-16.7978
leptodactylus_syphax	-42.8897	-16.5594
leptodactylus_syphax	-55.4	-15.8167
leptodactylus_syphax	-43.65	-19
leptodactylus_syphax	-48.22	-13.5331
leptodactylus_syphax	-56.4275	-14.8361
leptodactylus_syphax	-49.1486	-13.4408
leptodactylus_syphax	-49.4667	-18.9667
leptodactylus_syphax	-55.75	-15.4333
leptodactylus_syphax	-46.0356	-7.5325
leptodactylus_syphax	-56.515	-20.996
leptodactylus_syphax	-46.3881	-20.8636
leptodactylus_syphax	-56.715	-20.5386
leptodactylus_syphax	-55.7872	-20.4711
leptodactylus_syphax	-55.4984	-20.4551
leptodactylus_syphax	-55.6219	-20.4508
leptodactylus_syphax	-54.6464	-20.4428
leptodactylus_syphax	-54.8294	-19.8317
leptodactylus_syphax	-54.94	-19.8017
leptodactylus_syphax	-43.7447	-19.5136
leptodactylus_syphax	-43.6187	-19.3277
leptodactylus_syphax	-44.8989	-18.7581
leptodactylus_syphax	-44	-18
leptodactylus_syphax	-48.5325	-17.9889
leptodactylus_syphax	-54.606	-17.3359
leptodactylus_syphax	-46.0094	-17.0097
leptodactylus_syphax	-51.3967	-16.0078
leptodactylus_syphax	-55.8894	-15.48
leptodactylus_syphax	-53.4175	-15.345
leptodactylus_syphax	-55.5396	-15.1071
leptodactylus_syphax	-58.58	-15.1
leptodactylus_syphax	-48.3603	-10.2128
leptodactylus_syphax	-47.4511	-6.56056
leptodactylus_troglodytes	-43.764	-15.9898
leptodactylus_troglodytes	-46.2611	-7.12303
leptodactylus_troglodytes	-44.513	-13.51
leptodactylus_troglodytes	-46.4755	-12.8778
leptodactylus_troglodytes	-43.0226	-6.77693
leptodactylus_troglodytes	-45.8091	-14.6468
leptodactylus_troglodytes	-46.7255	-12.9131
leptodactylus_troglodytes	-45.9297	-14.7679
leptodactylus_troglodytes	-42.4656	-16.9517
leptodactylus_troglodytes	-44.66	-10.1578
leptodactylus_troglodytes	-46.1725	-17.7425
leptodactylus_troglodytes	-44.9525	-10.1253
leptodactylus_troglodytes	-45.0109	-12.1391
leptodactylus_troglodytes	-46.0356	-7.5325
leptodactylus_troglodytes	-45.2417	-18.2064
leptodactylus_troglodytes	-46.0094	-17.0097
leptodactylus_troglodytes	-43.7442	-16.8123
leptodactylus_troglodytes	-42.8897	-16.5594
leptodactylus_troglodytes	-44.4328	-13.6194
leptodactylus_troglodytes	-44.6367	-13.3433
leptodactylus_troglodytes	-46.7811	-12.8312
leptodactylus_troglodytes	-44.9733	-12.3633
leptodactylus_troglodytes	-48.3603	-10.2128
leptodactylus_troglodytes	-47.9258	-7.86
leptodactylus_troglodytes	-47.4694	-7.33278
leptodactylus_troglodytes	-48.4987	-7.24111
leptodactylus_troglodytes	-44.1321	-6.78638
leptodactylus_troglodytes	-45.8415	-6.60768
leptodactylus_troglodytes	-47.4664	-6.5625
leptodactylus_troglodytes	-42.7947	-5.0576
leptodactylus_troglodytes	-41.8214	-2.85833
odontophrynus_americanus	-49.0175	-22.7937
odontophrynus_americanus	-48.6158	-23.1017
odontophrynus_americanus	-50.2524	-24.5607
odontophrynus_americanus	-48.35	-23.4
odontophrynus_americanus	-48.4628	-23.3446
odontophrynus_americanus	-48.4448	-22.8859
odontophrynus_americanus	-56.609	-21.0457
odontophrynus_americanus	-56.515	-20.996
odontophrynus_americanus	-49.2961	-20.6101
odontophrynus_americanus	-45.6185	-20.3213
odontophrynus_americanus	-43.745	-19.5136
odontophrynus_americanus	-43.7144	-19.1689
odontophrynus_americanus	-43.6003	-18.2494
odontophrynus_americanus	-44.2669	-18.1092
odontophrynus_americanus	-53.3122	-17.9092
odontophrynus_americanus	-44.5775	-17.8867
odontophrynus_americanus	-44.173	-17.8734
odontophrynus_americanus	-44.1722	-17.7575
odontophrynus_americanus	-42.8897	-16.5594
odontophrynus_americanus	-42.5397	-15.6097
physalaemus_albifrons	-44.8611	-12.3181
physalaemus_albifrons	-44.66	-10.1578
physalaemus_albifrons	-44.9977	-12.1461
physalaemus_albifrons	-43.4167	-13.25
physalaemus_albifrons	-43.1401	-11.0907
physalaemus_albifrons	-43.4849	-11.1621
physalaemus_albifrons	-42.8897	-16.5594
physalaemus_albifrons	-45.0694	-16.3686
physalaemus_albifrons	-44.1321	-6.78638
physalaemus_albifrons	-41.8214	-2.85833
physalaemus_albifrons	-42.8264	-2.74694
physalaemus_albonotatus	-53.4001	-18.0896
physalaemus_albonotatus	-56.3783	-20.2406
physalaemus_albonotatus	-47.789	-14.1778
physalaemus_albonotatus	-56.4167	-14.8333
physalaemus_albonotatus	-56.6944	-20.1319
physalaemus_albonotatus	-56.0833	-15.5833
physalaemus_albonotatus	-56.7244	-21.1363
physalaemus_albonotatus	-56.4819	-21.1211
physalaemus_albonotatus	-56.5162	-20.9824
physalaemus_albonotatus	-54.8767	-20.7593
physalaemus_albonotatus	-56.715	-20.5386
physalaemus_albonotatus	-54.6413	-20.5065
physalaemus_albonotatus	-55.7872	-20.4711
physalaemus_albonotatus	-54.5598	-20.4547
physalaemus_albonotatus	-54.8294	-19.8317
physalaemus_albonotatus	-54.6186	-19.4275
physalaemus_albonotatus	-54.6106	-18.6752
physalaemus_albonotatus	-54.668	-16.5198
physalaemus_albonotatus	-54.9683	-15.9653
physalaemus_albonotatus	-56.5281	-15.8315
physalaemus_albonotatus	-54.9178	-15.8106
physalaemus_albonotatus	-55.8894	-15.48
physalaemus_albonotatus	-56.3658	-15.2047
physalaemus_albonotatus	-55.5396	-15.1071
physalaemus_albonotatus	-58.58	-15.1
physalaemus_albonotatus	-58.3104	-14.4346
physalaemus_albonotatus	-55.5959	-14.0751
physalaemus_albonotatus	-56.7834	-13.5907
physalaemus_albonotatus	-49.5289	-11.7969
physalaemus_albonotatus	-50.6694	-11.6172
physalaemus_centralis	-47.7731	-16.1123
physalaemus_centralis	-45.4311	-20.747
physalaemus_centralis	-43.8582	-16.7286
physalaemus_centralis	-47.939	-15.9503
physalaemus_centralis	-46.0081	-16.9924
physalaemus_centralis	-56.0683	-15.6187
physalaemus_centralis	-49.1513	-16.546
physalaemus_centralis	-47.6318	-16.7541
physalaemus_centralis	-51.4785	-16.5356
physalaemus_centralis	-51.5488	-19.0675
physalaemus_centralis	-56.4167	-14.8333
physalaemus_centralis	-46.7658	-12.9008
physalaemus_centralis	-50.937	-14.1826
physalaemus_centralis	-51.9264	-18.9653
physalaemus_centralis	-53.5667	-14.6167
physalaemus_centralis	-48.2072	-7.19111
physalaemus_centralis	-44.8611	-12.3181
physalaemus_centralis	-46.3694	-14.0931
physalaemus_centralis	-50.9281	-17.7981
physalaemus_centralis	-43.6314	-16.7978
physalaemus_centralis	-42.7133	-3.8898
physalaemus_centralis	-44.4328	-13.6194
physalaemus_centralis	-48.4597	-14.4739
physalaemus_centralis	-46.9578	-22.4319
physalaemus_centralis	-50.6561	-10.6817
physalaemus_centralis	-50.215	-16.1267
physalaemus_centralis	-47.0486	-11.6086
physalaemus_centralis	-48.4628	-23.3446
physalaemus_centralis	-48.4397	-22.88
physalaemus_centralis	-49.2089	-22.8137
physalaemus_centralis	-48.12	-22.78
physalaemus_centralis	-47.15	-22.7603
physalaemus_centralis	-49.0707	-22.3216
physalaemus_centralis	-48.1197	-22.2803
physalaemus_centralis	-47.826	-22.2496
physalaemus_centralis	-47.6256	-22.2206
physalaemus_centralis	-48.1697	-21.7903
physalaemus_centralis	-47.7	-21.55
physalaemus_centralis	-56.4403	-21.4569
physalaemus_centralis	-56.4819	-21.1211
physalaemus_centralis	-49.3796	-20.8108
physalaemus_centralis	-47.2871	-20.6415
physalaemus_centralis	-49.6492	-20.6264
physalaemus_centralis	-47.8211	-20.5527
physalaemus_centralis	-49.3142	-20.5339
physalaemus_centralis	-50.0866	-20.5144
physalaemus_centralis	-55.7872	-20.4711
physalaemus_centralis	-54.6464	-20.4428
physalaemus_centralis	-54.8603	-20.4422
physalaemus_centralis	-49.9722	-20.4252
[truncated: 1,184 more rows]
