# Supplementary material
Source: Elsevier journal article supplement (https://www.sciencedirect.com/science/article/pii/S2530064421000985)
Supplement: mmc2 [file S2530064421000985:mmc2.xlsx]

## Sheet: Plan1
Specie	Climatic scenario	Current (km²)	Future (km²)	Ecoregion	Elevation	SVL (mm)	Distribution	Habitat	Reproduction pattern	Records number
Adenomera hylaedactyla	optimistic	2774713	1954632	ecoregion 2	lowland	22	widespread	forest and open area	prolongated	19
Ameerega flavopicta	optimistic	1381027	398803	ecoregion 2	highland	30	widespread	rupestrian fields	prolongated	37
Boana albopunctata	optimistic	2012698	875014	ecoregion 2	highland	60	widespread	forest and open area	prolongated	77
Boana crepitans	optimistic	1814440	2431746	ecoregion 2	lowland	59	widespread	forest and open area	prolongated	19
Boana faber	optimistic	624042	242767	ecoregion 2	highland	80	widespread	forest	explosive	34
Boana lundii	optimistic	775007	287308	ecoregion 2	highland	70.8	endemic	forest	prolongated	43
Boana multifasciata	optimistic	1006112	1249348	ecoregion 2	lowland	83	widespread	open area	prolongated	17
Boana punctata	optimistic	2199447	1789678	ecoregion 2	lowland	36.9	widespread	forest and open area	prolongated	27
Boana raniceps	optimistic	2203818	1771961	ecoregion 2	lowland	75	widespread	forest and open area	prolongated	78
Bokermannohyla saxicola	optimistic	100514	108150	ecoregion 1	highland	55	endemic	rupestrian fields	prolongated	17
Chiasmocleis albopunctata	optimistic	1795650	883994	ecoregion 2	highland	24.94	endemic	open area	explosive	61
Dendropsophus cruzi	optimistic	2278000	1664794	ecoregion 2	lowland	19.4	endemic	open area	prolongated	26
Dendropsophus elianeae	optimistic	1815286	1253972	ecoregion 1	highland	22.8	endemic	open area	prolongated	35
Dendropsophus jimi	optimistic	1642002	584134	ecoregion 2	highland	18.78	endemic	open area	prolongated	20
Dendropsophus melanargyreus	optimistic	3140538	2645155	ecoregion 2	lowland	40.9	widespread	forest and open area	explosive	29
Dendropsophus minutus	optimistic	2495312	1797062	ecoregion 2	highland	23	widespread	forest and open area	prolongated	154
Dendropsophus nanus	optimistic	2596934	2149027	ecoregion 2	lowland	19.87	widespread	forest and open area	prolongated	125
Dendropsophus rubicundulus	optimistic	1907434	1802307	ecoregion 2	highland	23.4	endemic	open area	prolongated	58
Dendropsophus sanborni	optimistic	1154204	782090	ecoregion 1	highland	21.1	widespread	open area	prolongated	19
Elachistocleis bicolor	optimistic	2129168	2093544	ecoregion 2	highland	43	widespread	forest and open area	explosive	16
Elachistocleis cesarii	optimistic	1798667	905965	ecoregion 2	highland	24.94	widespread	open area	prolongated and explosive	44
Leptodactylus bolivianus	optimistic	1628540	2971143	ecoregion 2	lowland	60	endemic	forest and open area	explosive	15
Leptodactylus chaquensis	optimistic	2548658	2672618	ecoregion 2	lowland	82	widespread	open area	prolongated and explosive	83
Leptodactylus cunicularius	optimistic	178385	3008923	ecoregion 1	highland	46	widespread	open area	prolongated	11
Leptodactylus elenae	optimistic	2596935	1550564	ecoregion 2	highland	50	widespread	open area	prolongated	19
Leptodactylus furnarius	optimistic	1558271	1016836	ecoregion 2	highland	44	widespread	open area	prolongated	44
Leptodactylus fuscus	optimistic	2756358	2632630	ecoregion 2	lowland	47.2	widespread	open area	prolongated	166
Leptodactylus labyrinthicus	optimistic	2052460	1198631	ecoregion 2	highland	188	widespread	forest and open area	prolongated	127
Leptodactylus latrans	optimistic	2231594	2195994	ecoregion 2	highland	83.22	widespread	forest and open area	prolongated	71
Leptodactylus mystaceus	optimistic	1962514	1409604	ecoregion 2	highland	47.14	widespread	forest	prolongated	74
Leptodactylus mystacinus	optimistic	1866075	1428677	ecoregion 2	highland	55.8	widespread	open area	explosive	83
Leptodactylus petersii	optimistic	2761455	1607616	ecoregion 2	lowland	37.5	widespread	forest and open area	prolongated	14
Leptodactylus podicipinus	optimistic	2016760	2110548	ecoregion 2	lowland	54	widespread	open area	prolongated	125
Leptodactylus pustulatus	optimistic	1098424	2044486	ecoregion 2	lowland	36.22	widespread	open area	prolongated	23
Leptodactylus syphax	optimistic	2488970	1595670	ecoregion 2	highland	78	widespread	forest and open area	prolongated	37
Leptodactylus troglodytes	optimistic	1537966	1256163	ecoregion 2	lowland	40	widespread	open area	prolongated and explosive	31
Odontophrynus americanus	optimistic	902475	780889	ecoregion 1	highland	51	widespread	open area	prolongated and explosive	20
Odontophrynus cultripes	optimistic	924595	419813	ecoregion 2	highland	50	endemic	open area	prolongated and explosive	19
Physalaemus albifrons	optimistic	1063957	1064569	ecoregion 1	lowland	25	widespread	open area	prolongated	11
Physalaemus albonotatus	optimistic	2220053	1456066	ecoregion 2	lowland	34.1	widespread	open area	prolongated	30
Physalaemus centralis	optimistic	2759552	2126026	ecoregion 2	lowland	39.2	endemic	forest and open area	explosive	101
Physalaemus cicada	optimistic	884407	1936604	ecoregion 1	highland	25.38	widespread	open area	explosive	12
Physalaemus cuvieri	optimistic	2691951	1228987	ecoregion 2	lowland	29.17	widespread	open area	prolongated	193
Physalaemus nattereri	optimistic	2313880	1503552	ecoregion 2	highland	29.8	widespread	open area	explosive	133
Proceratophrys goyana	optimistic	1394075	3005683	ecoregion 2	lowland	38.8	endemic	forest and open area	prolongated	14
Pseudis bolbodactyla	optimistic	2796681	2551385	ecoregion 2	lowland	45	widespread	open area	prolongated	26
Pseudis platensis	optimistic	1152254	1325070	ecoregion 1	highland	57.5	widespread	open area	prolongated	21
Pseudopaludicola falcipes	optimistic	2705029	3257074	ecoregion 2	lowland	18.1	widespread	open area	explosive	25
Pseudopaludicola mineira	optimistic	220380	926533	ecoregion 1	highland	17.4	endemic	open area	explosive	12
Pseudopaludicola mystacalis	optimistic	2203559	2623574	ecoregion 2	lowland	16.1	widespread	open area	prolongated	55
Pseudopaludicola saltica	optimistic	1675466	2072925	ecoregion 2	highland	13.8	widespread	open area	prolongated	25
Rhinella diptycha	optimistic	1639811	631405	ecoregion 2	highland	100	widespread	open area	explosive	150
Rhinella margaritifera	optimistic	1542018	911073	ecoregion 2	lowland	74	widespread	forest	explosive	16
Rhinella ornata	optimistic	1281292	531838	ecoregion 2	highland	84.29	widespread	forest	prolongated	29
Rhinella rubescens	optimistic	842368	241663	ecoregion 1	highland	100	endemic	open area	explosive	44
Rhinella scitula	optimistic	633938	353033	ecoregion 2	highland	48	endemic	forest	explosive	15
Scinax catharinae	optimistic	637927	2241903	ecoregion 1	highland	45.5	endemic	forest	prolongated	10
Scinax fuscomarginatus	optimistic	2385586	1534336	ecoregion 2	lowland	22.21	widespread	open area	prolongated	107
Scinax fuscovarius	optimistic	1865884	933843	ecoregion 2	highland	47	widespread	forest and open area	prolongated	205
Scinax nasicus	optimistic	2242403	1547550	ecoregion 2	lowland	39	endemic	forest and open area	prolongated and explosive	20
Scinax squalirostris	optimistic	496630	207493	ecoregion 1	highland	29	widespread	forest and open area	prolongated	20
Thoropa megatympanum	optimistic	104367	99311	ecoregion 1	highland	53	endemic	rupestrian fields	prolongated	15
Trachycephalus nigromaculatus	optimistic	638708	1046954	ecoregion 1	highland	91.05	widespread	forest and open area	explosive	11
Adenomera hylaedactyla	pessimistic	2774713	1782700	ecoregion 2	lowland	22	widespread	forest and open area	prolongated	19
Ameerega flavopicta	pessimistic	1381027	190560	ecoregion 2	highland	30	widespread	rupestrian fields	prolongated	37
Boana albopunctata	pessimistic	2012698	810548	ecoregion 2	highland	60	widespread	forest and open area	prolongated	77
Boana crepitans	pessimistic	1814440	2655664	ecoregion 2	lowland	59	widespread	forest and open area	prolongated	19
Boana faber	pessimistic	624042	183924	ecoregion 2	highland	80	widespread	forest	explosive	34
Boana lundii	pessimistic	775007	222961	ecoregion 2	highland	70.8	endemic	forest	prolongated	43
Boana multifasciata	pessimistic	1006112	1278096	ecoregion 2	lowland	83	widespread	open area	prolongated	17
Boana punctata	pessimistic	2199447	1650358	ecoregion 2	lowland	36.9	widespread	forest and open area	prolongated	27
Boana raniceps	pessimistic	2203818	1627149	ecoregion 2	lowland	75	widespread	forest and open area	prolongated	78
Bokermannohyla saxicola	pessimistic	100514	136551	ecoregion 1	highland	55	endemic	rupestrian fields	prolongated	17
Chiasmocleis albopunctata	pessimistic	1795650	641941	ecoregion 2	highland	24.94	endemic	open area	explosive	61
Dendropsophus cruzi	pessimistic	2278000	1591790	ecoregion 2	lowland	19.4	endemic	open area	prolongated	26
Dendropsophus elianeae	pessimistic	1815286	1393837	ecoregion 1	highland	22.8	endemic	open area	prolongated	35
Dendropsophus jimi	pessimistic	1642002	499479	ecoregion 2	highland	18.78	endemic	open area	prolongated	20
Dendropsophus melanargyreus	pessimistic	3140538	2558688	ecoregion 2	lowland	40.9	widespread	forest and open area	explosive	29
Dendropsophus minutus	pessimistic	2495312	1460311	ecoregion 2	highland	23	widespread	forest and open area	prolongated	154
Dendropsophus nanus	pessimistic	2596934	2125870	ecoregion 2	lowland	19.87	widespread	forest and open area	prolongated	125
Dendropsophus rubicundulus	pessimistic	1907434	2014850	ecoregion 2	highland	23.4	endemic	open area	prolongated	58
Dendropsophus sanborni	pessimistic	1154204	763528	ecoregion 1	highland	21.1	widespread	open area	prolongated	19
Elachistocleis bicolor	pessimistic	2129168	2179920	ecoregion 2	highland	43	widespread	forest and open area	explosive	16
Elachistocleis cesarii	pessimistic	1798667	976048	ecoregion 2	highland	24.94	widespread	open area	prolongated and explosive	44
Leptodactylus bolivianus	pessimistic	1628540	3210002	ecoregion 2	lowland	60	endemic	forest and open area	explosive	15
Leptodactylus chaquensis	pessimistic	2548658	2656391	ecoregion 2	lowland	82	widespread	open area	prolongated and explosive	83
Leptodactylus cunicularius	pessimistic	178385	3001391	ecoregion 1	highland	46	widespread	open area	prolongated	11
Leptodactylus elenae	pessimistic	2596935	1446924	ecoregion 2	highland	50	widespread	open area	prolongated	19
Leptodactylus furnarius	pessimistic	1558271	1154016	ecoregion 2	highland	44	widespread	open area	prolongated	44
Leptodactylus fuscus	pessimistic	2756358	2647176	ecoregion 2	lowland	47.2	widespread	open area	prolongated	166
Leptodactylus labyrinthicus	pessimistic	2052460	1046731	ecoregion 2	highland	188	widespread	forest and open area	prolongated	127
Leptodactylus latrans	pessimistic	2231594	2442077	ecoregion 2	highland	83.22	widespread	forest and open area	prolongated	71
Leptodactylus mystaceus	pessimistic	1962514	1535216	ecoregion 2	highland	47.14	widespread	forest	prolongated	74
Leptodactylus mystacinus	pessimistic	1866075	1613407	ecoregion 2	highland	55.8	widespread	open area	explosive	83
Leptodactylus petersii	pessimistic	2761455	1757239	ecoregion 2	lowland	37.5	widespread	forest and open area	prolongated	14
Leptodactylus podicipinus	pessimistic	2016760	2032679	ecoregion 2	lowland	54	widespread	open area	prolongated	125
Leptodactylus pustulatus	pessimistic	1098424	2158748	ecoregion 2	lowland	36.22	widespread	open area	prolongated	23
Leptodactylus syphax	pessimistic	2488970	1444645	ecoregion 2	highland	78	widespread	forest and open area	prolongated	37
Leptodactylus troglodytes	pessimistic	1537966	1125995	ecoregion 2	lowland	40	widespread	open area	prolongated and explosive	31
Odontophrynus americanus	pessimistic	902475	887346	ecoregion 1	highland	51	widespread	open area	prolongated and explosive	20
Odontophrynus cultripes	pessimistic	924595	288125	ecoregion 2	highland	50	endemic	open area	prolongated and explosive	19
Physalaemus albifrons	pessimistic	1063957	1065531	ecoregion 1	lowland	25	widespread	open area	prolongated	11
Physalaemus albonotatus	pessimistic	2220053	1260149	ecoregion 2	lowland	34.1	widespread	open area	prolongated	30
Physalaemus centralis	pessimistic	2759552	1911204	ecoregion 2	lowland	39.2	endemic	forest and open area	explosive	101
Physalaemus cicada	pessimistic	884407	1801069	ecoregion 1	highland	25.38	widespread	open area	explosive	12
Physalaemus cuvieri	pessimistic	2691951	1064633	ecoregion 2	lowland	29.17	widespread	open area	prolongated	193
Physalaemus nattereri	pessimistic	2313880	1305747	ecoregion 2	highland	29.8	widespread	open area	explosive	133
proceratophrys goyana	pessimistic	1394075	2926622	ecoregion 2	lowland	38.8	endemic	forest and open area	prolongated	14
Pseudis bolbodactyla	pessimistic	2796681	2702654	ecoregion 2	lowland	45	widespread	open area	prolongated	26
Pseudis platensis	pessimistic	1152254	1182731	ecoregion 1	highland	57.5	widespread	open area	prolongated	21
Pseudopaludicola falcipes	pessimistic	2705029	3592086	ecoregion 2	lowland	18.1	widespread	open area	explosive	25
Pseudopaludicola mineira	pessimistic	220380	830318	ecoregion 1	highland	17.4	endemic	open area	explosive	12
Pseudopaludicola mystacalis	pessimistic	2203559	2811184	ecoregion 2	lowland	16.1	widespread	open area	prolongated	55
Pseudopaludicola saltica	pessimistic	1675466	1780622	ecoregion 2	highland	13.8	widespread	open area	prolongated	25
Rhinella diptycha	pessimistic	1639811	452284	ecoregion 2	highland	100	widespread	open area	explosive	150
Rhinella margaritifera	pessimistic	1542018	739604	ecoregion 2	lowland	74	widespread	forest	explosive	16
Rhinella ornata	pessimistic	1281292	437813	ecoregion 2	highland	84.29	widespread	forest	prolongated	29
Rhinella rubescens	pessimistic	842368	181504	ecoregion 1	highland	100	endemic	open area	explosive	44
Rhinella scitula	pessimistic	633938	233918	ecoregion 2	highland	48	endemic	forest	explosive	15
Scinax catharinae	pessimistic	637927	2021152	ecoregion 1	highland	45.5	endemic	forest	prolongated	10
Scinax fuscomarginatus	pessimistic	2385586	1213671	ecoregion 2	lowland	22.21	widespread	open area	prolongated	107
Scinax fuscovarius	pessimistic	1865884	741112	ecoregion 2	highland	47	widespread	forest and open area	prolongated	205
Scinax nasicus	pessimistic	2242403	1484731	ecoregion 2	lowland	39	endemic	forest and open area	prolongated and explosive	20
Scinax squalirostris	pessimistic	496630	197882	ecoregion 1	highland	29	widespread	forest and open area	prolongated	20
Thoropa megatympanum	pessimistic	104367	120948	ecoregion 1	highland	53	endemic	rupestrian fields	prolongated	15
Trachycephalus nigromaculatus	pessimistic	638708	1001914	ecoregion 1	highland	91.05	widespread	forest and open area	explosive	11
